# Supplementary material for: Constructing a cross-tissue human knee single-cell atlas identified osteoarthritis reduces regenerative tissue stem cells while increasing inflammatory pain macrophages
Source: Research Square preprint supplement (doi:10.21203/rs.3.rs-6247502/v1), 2025-05-05
Supplement: Supplementary file 1 [file 8f530a103583e4113587ed63.xlsx]

## Sheet: Table S1
Table S1: Specific markers expressed by all 27 cell clusters in combined healthy and OA samples
gene	p_val	avg_log2FC	pct.1	pct.2	p_val_adj	cluster
ECRG4	0	1.64387	0.994	0.318	0	0
SERPINA3	0	1.94591	0.854	0.279	0	0
CCN2	0	2.00902	0.874	0.31	0	0
SNHG29	0	1.62818	0.936	0.389	0	0
EEF1G	0	1.28005	0.921	0.399	0	0
LINC00632	0	1.85326	0.877	0.367	0	0
AOPEP	0	2.28493	0.717	0.208	0	0
H19	0	3.15889	0.61	0.12	0	0
SEPTIN7	0	1.44147	0.795	0.324	0	0
GAS5	0	1.35205	0.833	0.37	0	0
NME2	0	1.31951	0.916	0.457	0	0
SNHG6	0	1.30965	0.826	0.37	0	0						Edit and keep only 20-30 markers from each cluster
SNHG5	0	1.39246	0.836	0.392	0	0
MIA	0	1.529	0.917	0.48	0	0
CCN1	0	1.59296	0.686	0.257	0	0
TOMM6	0	1.54181	0.698	0.282	0	0
GABARAP	0	1.24415	0.898	0.485	0	0
LINC01578	0	1.51345	0.73	0.326	0	0
MICOS10	0	1.43064	0.697	0.298	0	0
MAGI2-AS3	0	1.57144	0.646	0.252	0	0
RNASEK	0	1.0852	0.831	0.444	0	0
OGN	0	2.41211	0.942	0.561	0	0
CHI3L2	0	1.066	0.927	0.564	0	0
ASPN	0	1.54496	0.781	0.432	0	0
SNHG32	0	1.53013	0.575	0.231	0	0
S100B	0	0.525375	0.746	0.407	0	0
RBIS	0	1.48389	0.576	0.239	0	0
FIBIN	0	1.63018	0.725	0.392	0	0
CCN6	0	2.18424	0.438	0.111	0	0
ATP6V0C	0	0.913247	0.618	0.307	0	0
ACAN	0	0.32118	0.894	0.585	0	0
GLI3	0	2.08108	0.566	0.259	0	0
COL2A1	0	0.54485	0.755	0.45	0	0
RPL17	0	1.42145	0.992	0.688	0	0
COL11A1	0	1.26578	0.686	0.386	0	0
FGFR2	0	2.17454	0.464	0.168	0	0
CIAO2B	0	1.24849	0.549	0.253	0	0
CDK2AP1	0	1.30363	0.649	0.362	0	0
SCRG1	0	0.744921	0.968	0.688	0	0
DANCR	0	1.25636	0.499	0.221	0	0
RPS17	0	1.31302	0.944	0.667	0	0
GNG10	0	1.296	0.528	0.256	0	0
GPC6	0	1.25914	0.649	0.377	0	0
HAPLN1	0	0.423478	0.813	0.546	0	0
EDIL3	0	1.19638	0.832	0.568	0	0
TNC	0	1.17478	0.622	0.359	0	0
PLCG2	0	1.50745	0.797	0.535	0	0
MRPS24	0	1.00092	0.53	0.27	0	0
RNASE4	0	0.944517	0.527	0.267	0	0
TCEAL2	0	1.16877	0.664	0.409	0	0
CTHRC1	0	1.57691	0.504	0.25	0	0
SEPTIN2	0	1.11897	0.475	0.222	0	0
TRAPPC5	0	1.15465	0.495	0.244	0	0
CRIP1	0	0.733941	0.753	0.503	0	0
COL12A1	0	1.46627	0.587	0.337	0	0
ITGA10	0	1.14937	0.718	0.469	0	0
AL627171.2	0	1.54898	0.401	0.155	0	0
MICOS13	0	1.16167	0.482	0.237	0	0
SERTAD4-AS1	0	1.25232	0.561	0.319	0	0
WWP2	0	1.06665	0.662	0.422	0	0
SPINT2	0	0.664204	0.688	0.448	0	0
ANGPTL2	0	1.1525	0.776	0.54	0	0
CHI3L1	0	0.952649	0.764	0.529	0	0
ANOS1	0	2.65065	0.338	0.105	0	0
ADGRG6	0	2.1436	0.373	0.14	0	0
COL3A1	0	1.08785	0.881	0.65	0	0
MIR100HG	0	1.23762	0.396	0.166	0	0
CILP2	0	0.862578	0.654	0.425	0	0
COLEC12	0	1.21926	0.61	0.382	0	0
NDNF	0	1.94757	0.401	0.176	0	0
FMOD	0	1.18639	0.979	0.755	0	0
SOX5	0	1.26969	0.682	0.459	0	0
SEMA3D	0	2.22394	0.365	0.142	0	0
VCAM1	0	1.3477	0.45	0.229	0	0
RPL36A	0	1.03758	0.97	0.749	0	0
PTPRD	0	1.75225	0.415	0.194	0	0
GDF10	0	1.11645	0.46	0.24	0	0
C18orf32	0	1.04636	0.556	0.338	0	0
SEPTIN10	0	1.50398	0.366	0.148	0	0
PLXDC2	0	1.10979	0.8	0.584	0	0
CFB	0	1.08969	0.427	0.213	0	0
COX16	0	1.26871	0.488	0.274	0	0
PART1	0	1.85665	0.395	0.182	0	0
MTLN	0	1.57394	0.363	0.151	0	0
COL5A2	0	0.858667	0.706	0.494	0	0
SNHG14	0	1.72023	0.348	0.136	0	0
ENPP1	0	0.938188	0.712	0.501	0	0
NDUFA4L2	0	0.627097	0.987	0.776	0	0
DDR2	0	1.1772	0.787	0.577	0	0
PLA2G2A	0	0.859682	0.933	0.725	0	0
LIMCH1	0	1.22758	0.563	0.355	0	0
SMOC1	0	1.44993	0.487	0.279	0	0
TLE5	0	0.858611	0.43	0.223	0	0
SCARA3	0	1.20919	0.686	0.483	0	0
SSPN	0	0.763912	0.664	0.469	0	0
AEBP1	0	0.94835	0.821	0.626	0	0
SMOC2	0	1.24583	0.648	0.454	0	0
COMP	0	0.591924	0.989	0.795	0	0
SLC40A1	0	1.58668	0.431	0.238	0	0
LAG3	0	1.03503	0.557	0.366	0	0
SULF2	0	1.28501	0.57	0.379	0	0
ITIH6	0	1.80976	0.338	0.149	0	0
PLAAT3	0	1.24594	0.345	0.156	0	0
CILP	0	0.8796	0.827	0.638	0	0
EPB41L2	0	0.946539	0.668	0.482	0	0
PDK3	0	1.49255	0.399	0.213	0	0
TXNDC5	0	1.33154	0.343	0.158	0	0
POGLUT3	0	1.68696	0.293	0.108	0	0
CDO1	0	0.604681	0.834	0.65	0	0
NDUFA13	0	0.837836	0.795	0.612	0	0
ADIRF	0	0.416785	0.884	0.702	0	0
SNHG16	0	0.95143	0.386	0.204	0	0
SOD3	0	0.585996	0.99	0.808	0	0
SOX9	0	0.792184	0.711	0.529	0	0
CCPG1	0	1.20673	0.878	0.697	0	0
OSMR	0	1.17389	0.608	0.428	0	0
ERG	0	1.38794	0.398	0.22	0	0
ISLR	0	0.857895	0.694	0.516	0	0
CDON	0	1.21278	0.51	0.334	0	0
BGN	0	0.985344	0.996	0.821	0	0
TCEAL6	0	1.5657	0.352	0.177	0	0
ANKH	0	0.934446	0.772	0.598	0	0
TMEM35B	0	1.15494	0.337	0.163	0	0
HYMAI	0	1.84462	0.266	0.092	0	0
PRELP	0	0.492223	0.975	0.801	0	0
NTN1	0	2.02762	0.298	0.125	0	0
ISM1	0	1.28193	0.398	0.226	0	0
MXRA5	0	0.950134	0.344	0.172	0	0
TSC22D1	0	0.860348	0.881	0.71	0	0
MIF	0	1.34516	0.972	0.801	0	0
FAP	0	1.11166	0.406	0.237	0	0
DIO2	0	1.55192	0.352	0.183	0	0
GAS1	0	1.36294	0.527	0.359	0	0
PLAC9	0	0.458564	0.906	0.738	0	0
GABPB1-IT1	0	1.38231	0.299	0.132	0	0
RO60	0	1.19538	0.33	0.164	0	0
CFH	0	0.809733	0.894	0.729	0	0
P4HA1	0	0.860097	0.753	0.588	0	0
TSPAN2	0	0.842458	0.478	0.314	0	0
POLD4	0	0.887579	0.399	0.236	0	0
PALM2-AKAP2	0	1.31493	0.256	0.093	0	0
PPP1R3C	0	0.731595	0.573	0.41	0	0
NGRN	0	0.933725	0.425	0.262	0	0
ECM2	0	0.893713	0.5	0.338	0	0
PCOLCE	0	0.497323	0.747	0.587	0	0
COL15A1	0	0.908841	0.462	0.303	0	0
LSP1	0	0.71998	0.585	0.426	0	0
NFIA	0	0.848722	0.606	0.448	0	0
SEMA3E	0	1.06848	0.482	0.324	0	0
GPR88	0	2.77317	0.203	0.046	0	0
ADAMTS6	0	1.72007	0.399	0.242	0	0
ABCA5	0	1.22055	0.441	0.284	0	0
KRTCAP2	0	0.836764	0.784	0.63	0	0
CRIM1	0	1.08009	0.482	0.328	0	0
MIR99AHG	0	1.06325	0.434	0.281	0	0
SAMD4A	0	1.20235	0.45	0.298	0	0
KIF13B	0	1.27932	0.379	0.229	0	0
PLAGL1	0	1.12549	0.494	0.345	0	0
COA8	0	1.30209	0.275	0.126	0	0
SEPTIN6	0	1.46948	0.248	0.099	0	0
ADGRG2	0	1.4687	0.349	0.2	0	0
CZIB	0	1.0722	0.306	0.158	0	0
OIP5-AS1	0	1.18397	0.291	0.143	0	0
GLT8D2	0	1.0344	0.427	0.279	0	0
ZNRD2	0	1.47485	0.254	0.107	0	0
MDP1	0	1.30612	0.32	0.174	0	0
PXYLP1	0	1.3748	0.337	0.192	0	0
TCF4	0	0.735977	0.667	0.522	0	0
NIBAN2	0	1.35838	0.258	0.113	0	0
COL11A2	0	0.508761	0.506	0.363	0	0
CREB5	0	0.725103	0.517	0.374	0	0
UBE2V1	0	0.904441	0.393	0.25	0	0
IFITM10	0	1.86055	0.235	0.092	0	0
THBS1	0	1.18773	0.593	0.45	0	0
AK1	0	0.648386	0.581	0.44	0	0
CSGALNACT1	0	0.761114	0.534	0.394	0	0
TOMM5	0	0.794637	0.516	0.376	0	0
CMC4	0	1.53383	0.244	0.105	0	0
MAP2K6	0	1.14731	0.331	0.193	0	0
FBXO2	0	0.272973	0.656	0.519	0	0
NDUFA7	0	1.07125	0.317	0.18	0	0
TASOR2	0	1.47398	0.242	0.105	0	0
USP53	0	0.994088	0.595	0.458	0	0
PDE4D	0	1.04756	0.38	0.244	0	0
SBSPON	0	1.07891	0.306	0.17	0	0
GMDS	0	0.936017	0.503	0.368	0	0
AC113383.1	0	1.84726	0.241	0.107	0	0
CD109	0	0.831035	0.572	0.438	0	0
TGFBR2	0	0.747586	0.719	0.586	0	0
OMD	0	0.955556	0.506	0.373	0	0
CD302	0	0.788858	0.447	0.316	0	0
TUG1	0	0.981619	0.294	0.163	0	0
RAB30-DT	0	1.498	0.226	0.096	0	0
LUM	0	0.975398	0.992	0.864	0	0
IFITM3	0	0.428759	0.94	0.813	0	0
GALNT18	0	0.974453	0.376	0.249	0	0
FZD8	0	1.08012	0.358	0.231	0	0
FAM162A	0	0.975301	0.729	0.603	0	0
SDC2	0	0.529553	0.748	0.622	0	0
NEBL	0	0.623931	0.468	0.342	0	0
COL5A1	0	0.700481	0.469	0.343	0	0
PPP3CA	0	0.772642	0.777	0.652	0	0
TCEAL4	0	0.78328	0.769	0.644	0	0
CLEC3A	0	0.472767	0.447	0.322	0	0
BOC	0	0.958002	0.39	0.266	0	0
PCSK1N	0	1.25003	0.31	0.186	0	0
BMI1	0	1.11544	0.349	0.225	0	0
FRMD4B	0	0.854311	0.42	0.297	0	0
CCDC18-AS1	0	1.46192	0.219	0.096	0	0
SLC16A10	0	1.58919	0.249	0.127	0	0
FXYD6	0	0.522731	0.567	0.445	0	0
AC018521.5	0	1.62281	0.196	0.075	0	0
SPARC	0	0.288836	0.894	0.774	0	0
MAF	0	0.773333	0.428	0.308	0	0
PLOD2	0	0.465581	0.778	0.659	0	0
RBM4	0	0.770448	0.391	0.272	0	0
PIEZO2	0	2.262	0.189	0.07	0	0
SPON1	0	1.59806	0.198	0.08	0	0
ZNF385D	0	0.695677	0.578	0.46	0	0
A2M	0	0.51638	0.464	0.347	0	0
MBOAT1	0	1.58195	0.211	0.094	0	0
PAM	0	0.776922	0.641	0.526	0	0
NIBAN1	0	1.15682	0.208	0.093	0	0
KIAA0040	0	0.86561	0.542	0.428	0	0
FBLN7	0	1.28722	0.276	0.162	0	0
SDC1	0	1.52608	0.216	0.102	0	0
ITIH5	0	1.03885	0.346	0.233	0	0
ZNF704	0	1.03606	0.335	0.223	0	0
GALNT4	0	1.78289	0.17	0.058	0	0
ADAMTSL3	0	1.29535	0.271	0.159	0	0
GIHCG	0	1.18874	0.217	0.105	0	0
CCDC80	0	0.557343	0.727	0.615	0	0
MATN2	0	1.02456	0.308	0.196	0	0
CBX5	0	0.732956	0.631	0.519	0	0
LINC-PINT	0	0.657351	0.265	0.154	0	0
SUSD5	0	0.966131	0.367	0.256	0	0
DDX39B	0	0.655227	0.421	0.31	0	0
MAML2	0	0.877932	0.417	0.306	0	0
PRKCQ-AS1	0	2.5219	0.143	0.032	0	0
BEX3	0	0.502781	0.659	0.549	0	0
ABI3BP	0	0.614992	0.664	0.556	0	0
TRPS1	0	0.774628	0.646	0.538	0	0
LDLRAD3	0	1.26849	0.264	0.157	0	0
BSCL2	0	1.06859	0.23	0.123	0	0
BMERB1	0	1.18679	0.199	0.092	0	0
SLC66A2	0	1.26348	0.195	0.088	0	0
C17orf49	0	0.861488	0.292	0.185	0	0
ITPR2	0	0.845651	0.456	0.35	0	0
FRY	0	1.01528	0.321	0.215	0	0
SOX6	0	1.51173	0.223	0.117	0	0
ATP5IF1	0	0.581171	0.724	0.618	0	0
MAP7D3	0	0.942162	0.469	0.363	0	0
MAPRE2	0	0.855719	0.414	0.308	0	0
ST6GALNAC6	0	0.756882	0.257	0.152	0	0
CRIM1-DT	0	1.89166	0.158	0.053	0	0
GALNT5	0	1.33617	0.21	0.105	0	0
SHISA2	0	1.99382	0.179	0.074	0	0
SDK2	0	1.15025	0.283	0.179	0	0
SGCD	0	1.08508	0.266	0.163	0	0
FN1	0	0.631978	0.998	0.895	0	0
WWTR1	0	0.652608	0.597	0.494	0	0
SULF1	0	1.02426	0.288	0.185	0	0
CCND2	0	0.639428	0.511	0.409	0	0
PRKCZ	0	0.976016	0.324	0.222	0	0
SARNP	0	0.82241	0.324	0.222	0	0
TASOR	0	1.30572	0.197	0.095	0	0
SHFL	0	1.36146	0.182	0.08	0	0
RPP21	0	0.868993	0.304	0.202	0	0
DIXDC1	0	0.739863	0.477	0.375	0	0
NET1	0	0.825231	0.41	0.308	0	0
CNN3	0	0.689692	0.677	0.576	0	0
TNNT3	0	1.33634	0.223	0.122	0	0
TPT1-AS1	0	1.26256	0.196	0.095	0	0
TMEM45A	0	0.599912	0.536	0.436	0	0
CPXM2	0	1.22627	0.21	0.11	0	0
CRTAP	0	0.649084	0.748	0.648	0	0
CHCHD10	0	0.644383	0.472	0.372	0	0
TM9SF1	0	0.951847	0.274	0.175	0	0
RBM27	0	0.90228	0.305	0.206	0	0
COL27A1	0	0.910714	0.367	0.268	0	0
ATP1B1	0	0.452965	0.511	0.413	0	0
EGFLAM	0	1.11079	0.257	0.16	0	0
SNHG1	0	0.787917	0.238	0.142	0	0
PDK1	0	0.983435	0.286	0.19	0	0
PAM16	0	1.0218	0.239	0.144	0	0
PODNL1	0	0.960321	0.312	0.217	0	0
NCBP2AS2	0	1.21303	0.184	0.089	0	0
MRC2	0	0.544271	0.48	0.385	0	0
DST	0	0.612583	0.803	0.709	0	0
RORA	0	0.664644	0.521	0.427	0	0
SMARCE1	0	0.667945	0.391	0.297	0	0
TMEM161B-AS1	0	1.18757	0.25	0.156	0	0
GPM6B	0	0.922466	0.263	0.169	0	0
ZNF483	0	1.44484	0.192	0.098	0	0
DIPK2A	0	1.25069	0.182	0.088	0	0
IVNS1ABP	0	0.61765	0.631	0.537	0	0
TSPAN6	0	0.690383	0.436	0.342	0	0
SLC26A4	0	2.28396	0.14	0.047	0	0
SEPTIN1	0	1.19746	0.186	0.093	0	0
UPK3BL1	0	1.29479	0.174	0.081	0	0
HIF1A	0	0.49153	0.734	0.641	0	0
VKORC1	0	0.442233	0.826	0.733	0	0
FKBP7	0	0.750614	0.439	0.347	0	0
TUSC3	0	0.797771	0.33	0.238	0	0
ZNF395	0	0.73579	0.337	0.245	0	0
MT1F	0	0.488736	0.461	0.369	0	0
GPM6A	0	2.08087	0.136	0.044	0	0
ANKHD1	0	0.790489	0.301	0.209	0	0
SOX4	0	0.471122	0.601	0.509	0	0
TTC3	0	0.585572	0.695	0.603	0	0
BHLHE41	0	0.719968	0.513	0.422	0	0
ATP2B4	0	0.688093	0.421	0.33	0	0
ERLEC1	0	0.681273	0.639	0.548	0	0
SSR3	0	0.556271	0.893	0.802	0	0
NUCB2	0	0.537279	0.752	0.662	0	0
HTRA1	0	0.554423	0.861	0.771	0	0
NPAS3	0	1.59859	0.171	0.082	0	0
MIR210HG	0	0.759966	0.313	0.224	0	0
SILC1	0	3.15574	0.106	0.017	0	0
PHTF2	0	0.842707	0.365	0.276	0	0
CLU	0	1.21845	1	0.911	0	0
DCN	0	0.6157	1	0.911	0	0
RRBP1	0	0.593742	0.788	0.7	0	0
SYNPO	0	0.718644	0.328	0.24	0	0
SGK3	0	0.910642	0.329	0.241	0	0
AC008771.1	0	1.11718	0.248	0.16	0	0
BAALC	0	0.968007	0.206	0.118	0	0
LRMDA	0	0.886405	0.315	0.227	0	0
NORAD	0	0.635341	0.775	0.687	0	0
GPRC5C	0	0.593468	0.37	0.283	0	0
UBASH3B	0	1.7818	0.154	0.067	0	0
WDFY3-AS2	0	1.51244	0.151	0.064	0	0
NUCKS1	0	0.683957	0.871	0.784	0	0
PALMD	0	0.63861	0.433	0.347	0	0
BARX1	0	0.573028	0.452	0.366	0	0
FAM174C	0	0.888988	0.193	0.107	0	0
MRPL38	0	0.922398	0.205	0.119	0	0
DLEU1	0	1.54568	0.147	0.061	0	0
GET1	0	1.14202	0.18	0.094	0	0
LIFR	0	0.694733	0.339	0.254	0	0
RAD50	0	0.907113	0.227	0.142	0	0
AC092958.1	0	1.50843	0.156	0.071	0	0
LINC00963	0	0.811948	0.202	0.117	0	0
LRP1	0	0.412474	0.826	0.741	0	0
COPZ2	0	0.383564	0.612	0.527	0	0
WBP1	0	1.05123	0.184	0.1	0	0
SEMA3A	0	0.850965	0.251	0.167	0	0
DMAC2L	0	1.41915	0.151	0.067	0	0
LINC01116	0	0.766614	0.347	0.263	0	0
IQSEC1	0	0.710221	0.384	0.301	0	0
FARP1	0	0.793692	0.376	0.293	0	0
PCBP1-AS1	0	1.37733	0.159	0.076	0	0
VSIG10L2	0	1.39496	0.18	0.097	0	0
BCAT1	0	0.490479	0.72	0.637	0	0
CREB3L2	0	0.687991	0.528	0.446	0	0
RERG	0	0.6117	0.432	0.35	0	0
PWWP3A	0	1.12719	0.169	0.087	0	0
CHST6	0	1.22797	0.196	0.114	0	0
TCEAL3	0	0.675335	0.579	0.497	0	0
AHNAK	0	0.364805	0.853	0.771	0	0
BNIP3	0	0.478561	0.68	0.599	0	0
GDF6	0	2.80358	0.108	0.027	0	0
ZNF667-AS1	0	0.927685	0.286	0.205	0	0
CD27-AS1	0	1.31492	0.154	0.074	0	0
HOXC10	0	0.651883	0.4	0.321	0	0
CASC4	0	0.643596	0.512	0.433	0	0
SEPTIN11	0	0.698997	0.198	0.119	0	0
HHIPL2	0	1.01125	0.233	0.155	0	0
ITPRID2	0	0.892128	0.178	0.1	0	0
THBS3	0	0.890929	0.225	0.148	0	0
SERTAD4	0	0.824874	0.249	0.172	0	0
AC005670.3	0	1.53248	0.133	0.056	0	0
CD79B	0	1.87923	0.186	0.109	0	0
VIT	0	0.976929	0.239	0.162	0	0
AC127502.2	0	1.81003	0.119	0.042	0	0
PAPSS2	0	0.500762	0.573	0.496	0	0
MGP	0	0.603199	0.999	0.922	0	0
CTBS	0	0.579859	0.527	0.451	0	0
C5orf15	0	0.70588	0.448	0.372	0	0
F5	0	0.99516	0.174	0.098	0	0
SIPA1L2	0	0.822288	0.289	0.213	0	0
TMTC1	0	0.802094	0.287	0.211	0	0
FGF18	0	0.987196	0.199	0.124	0	0
CPQ	0	0.502365	0.498	0.423	0	0
HIF1A-AS3	0	2.27891	0.105	0.03	0	0
CIAO2A	0	1.13687	0.154	0.079	0	0
TPD52	0	0.86661	0.261	0.187	0	0
CDC42EP5	0	0.520501	0.528	0.454	0	0
DENND10	0	1.14574	0.15	0.076	0	0
PPIC	0	0.416327	0.605	0.531	0	0
RWDD3	0	1.33081	0.14	0.067	0	0
LINC01140	0	1.01417	0.155	0.082	0	0
UGP2	0	0.581771	0.756	0.683	0	0
DMAC1	0	0.671184	0.45	0.379	0	0
AC097376.3	0	1.36782	0.132	0.061	0	0
CYP26B1	0	1.40952	0.179	0.108	0	0
ANTKMT	0	1.02804	0.148	0.077	0	0
PTTG1IP	0	0.539687	0.736	0.665	0	0
TRIM52-AS1	0	1.31325	0.133	0.063	0	0
PIFO	0	1.50445	0.136	0.067	0	0
SNHG17	0	1.08266	0.151	0.082	0	0
NFIX	0	0.514141	0.543	0.475	0	0
NRK	0	1.36364	0.156	0.088	0	0
CERT1	0	0.821116	0.168	0.1	0	0
AL157373.2	0	1.25796	0.172	0.104	0	0
NAP1L1	0	0.635944	0.881	0.814	0	0
DLX6-AS1	0	1.63902	0.122	0.055	0	0
ERCC5	0	1.01571	0.156	0.089	0	0
FOXP1	0	0.480566	0.588	0.521	0	0
SOX9-AS1	0	1.44393	0.116	0.05	0	0
FNDC3B	0	0.5274	0.647	0.582	0	0
PPDPF	0	0.553396	0.859	0.794	0	0
C12orf57	0	0.390604	0.908	0.844	0	0
CYS1	0	1.01815	0.177	0.113	0	0
TNFSF13	0	0.826684	0.142	0.078	0	0
PLSCR3	0	1.2412	0.118	0.055	0	0
SNHG30	0	1.09404	0.131	0.068	0	0
CABCOCO1	0	1.28739	0.141	0.078	0	0
TBL1XR1	0	0.705436	0.463	0.401	0	0
USP9Y	0	1.17323	0.127	0.065	0	0
GARS-DT	0	1.18881	0.129	0.067	0	0
YAE1	0	1.36621	0.12	0.058	0	0
COX7A1	0	0.509172	0.652	0.591	0	0
AP000873.2	0	1.43651	0.116	0.055	0	0
AC245407.2	0	1.57427	0.104	0.043	0	0
ACAD11	0	1.56214	0.104	0.044	0	0
LTBP3	0	0.530522	0.62	0.56	0	0
CFAP410	0	1.01101	0.128	0.069	0	0
NDUFA11	0	0.594359	0.778	0.72	0	0
LY75	0	1.57884	0.1	0.042	0	0
TTC28-AS1	0	1.31105	0.113	0.055	0	0
ARL6IP5	0	0.351638	0.835	0.777	0	0
NUP42	0	1.16063	0.113	0.056	0	0
BOLA2	0	1.11936	0.12	0.063	0	0
NIPBL-DT	0	1.30814	0.108	0.052	0	0
SEPTIN8	0	1.10257	0.111	0.055	0	0
ILRUN	0	1.12825	0.113	0.057	0	0
MFSD14A	0	1.01935	0.124	0.068	0	0
RPS26	0	0.743702	0.975	0.919	0	0
MAGED2	0	0.365091	0.664	0.609	0	0
LINC00641	0	1.40072	0.101	0.046	0	0
DUT	0	0.459466	0.659	0.605	0	0
MTRES1	0	1.24339	0.106	0.052	0	0
STMP1	0	0.611871	0.565	0.511	0	0
SNHG8	0	0.284076	0.776	0.723	0	0
UQCRB	0	0.468637	0.926	0.873	0	0
ZCRB1	0	0.556114	0.586	0.533	0	0
HLA-F-AS1	0	1.26653	0.1	0.049	0	0
IL6ST	0	0.40622	0.704	0.653	0	0
TIMP1	0	0.535205	0.972	0.921	0	0
UQCR11	0	0.502567	0.733	0.684	0	0
CHURC1	0	0.467223	0.65	0.602	0	0
NDUFC1	0	0.444559	0.749	0.702	0	0
COMMD6	0	0.51633	0.9	0.853	0	0
RCN2	0	0.470251	0.612	0.565	0	0
ETFB	0	0.48585	0.565	0.518	0	0
RPL7	0	0.382106	0.973	0.927	0	0
SELENOH	0	0.478508	0.587	0.541	0	0
MRPL33	0	0.514751	0.679	0.634	0	0
N4BP2L2	0	0.48008	0.727	0.684	0	0
SIVA1	0	0.517856	0.729	0.687	0	0
RPL21	0	0.297858	0.995	0.954	0	0
GABARAPL2	0	0.269088	0.855	0.819	0	0
REXO2	0	0.343603	0.757	0.723	0	0
TOMM7	0	0.313788	0.948	0.919	0	0
EID1	0	0.256311	0.894	0.866	0	0
TMEM258	0	0.320892	0.834	0.807	0	0
SEC62	0	0.483045	0.842	0.816	0	0
SOD1	0	0.357322	0.936	0.91	0	0
RPL13A	0	0.441547	0.983	0.958	0	0
RPL22	0	0.333524	0.989	0.967	0	0
RPL27A	0	0.330921	0.976	0.955	0	0
ITM2B	0	0.533542	0.995	0.978	0	0
GAPDH	0	0.289105	0.986	0.97	0	0
RPL31	0	0.341625	0.909	0.894	0	0
RPL41	0	0.339662	0.999	0.985	0	0
RPL23	0	0.511956	0.971	0.957	0	0
RPS11	0	0.481035	0.992	0.98	0	0
RPS21	0	0.267536	0.98	0.969	0	0
RPL6	0	0.280344	0.991	0.981	0	0
PFDN5	0	0.286556	0.973	0.964	0	0
HMGB1	0	0.345831	0.948	0.94	0	0
SERF2	0	0.348661	0.986	0.979	0	0
RPL12	0	0.329498	0.994	0.988	0	0
RPL26	0	0.327683	0.994	0.988	0	0
RPL24	0	0.293984	0.993	0.988	0	0
RPS25	0	0.266723	0.992	0.987	0	0
RPLP0	0	0.354504	0.987	0.982	0	0
MALAT1	0	0.277021	0.993	0.997	0	0
RPL34	0	0.375611	0.997	0.994	0	0
RPS14	0	0.325796	0.996	0.993	0	0
RPS20	0	0.390046	0.943	0.946	0	0
RPS6	0	0.265712	0.996	0.994	0	0
RPS8	0	0.567851	0.996	0.995	0	0
RPS4X	0	0.269932	0.996	0.995	0	0
RPLP1	0	0.283435	0.999	0.998	0	0
TPT1	0	0.266506	0.998	0.998	0	0
NAA38	3.30739e-307	0.465857	0.589	0.536	2.10631e-302	0
C4orf48	5.69799e-303	0.578102	0.378	0.294	3.62876e-298	0
TNS3	1.4205e-302	0.698427	0.355	0.278	9.04646e-298	0
RAB27A	1.65409e-302	0.730885	0.335	0.261	1.0534e-297	0
TET1	2.80115e-300	1.04366	0.181	0.117	1.78391e-295	0
MMUT	1.76822e-299	0.997951	0.13	0.075	1.12609e-294	0
BMPER	1.79534e-298	1.21256	0.124	0.071	1.14336e-293	0
STEAP3	3.70644e-295	0.817142	0.256	0.183	2.36044e-290	0
PSMD9	1.44945e-293	0.59445	0.379	0.302	9.23079e-289	0
DDX17	1.51877e-293	0.425891	0.713	0.695	9.67229e-289	0
CMPK1	1.17889e-291	0.402205	0.648	0.619	7.50775e-287	0
FTX	8.33462e-290	0.788581	0.35	0.277	5.3079e-285	0
CCL28	3.51928e-289	1.03272	0.163	0.103	2.24126e-284	0
C5orf56	2.76235e-288	0.772796	0.129	0.074	1.7592e-283	0
LUC7L2	2.79356e-288	0.576918	0.465	0.402	1.77908e-283	0
MPHOSPH8	7.59156e-287	0.422154	0.637	0.603	4.83468e-282	0
ATRAID	1.78794e-285	0.325711	0.712	0.685	1.13865e-280	0
MAN1A2	5.07864e-285	0.646931	0.425	0.366	3.23433e-280	0
HLF	1.25776e-284	0.952998	0.179	0.116	8.01004e-280	0
EMILIN3	1.54874e-284	1.02747	0.156	0.097	9.86318e-280	0
PDGFRL	1.60899e-284	0.364046	0.423	0.339	1.02468e-279	0
GPRASP1	5.36872e-283	1.07753	0.169	0.109	3.41907e-278	0
ZNF585A	1.13374e-282	1.10397	0.124	0.071	7.2202e-278	0
PAGR1	1.29769e-280	0.842567	0.154	0.094	8.26432e-276	0
LINC02256	3.64273e-280	1.11732	0.161	0.102	2.31988e-275	0
MT1E	4.08285e-280	0.447584	0.909	0.84	2.60016e-275	0
LRIG3	3.47477e-279	0.930778	0.217	0.15	2.21291e-274	0
PRKG1	1.72532e-277	0.964025	0.213	0.148	1.09877e-272	0
JPX	1.92132e-276	0.74661	0.376	0.311	1.22359e-271	0
BCKDHA	5.49801e-276	0.917844	0.125	0.072	3.50141e-271	0
MALL	5.64458e-276	0.749769	0.286	0.216	3.59475e-271	0
SERPINA5	6.08617e-276	0.345863	0.439	0.353	3.87598e-271	0
ARL5A	5.88324e-275	0.57818	0.324	0.245	3.74674e-270	0
LINC00342	4.42457e-272	1.07962	0.105	0.057	2.81779e-267	0
TCEA3	2.62193e-269	0.651223	0.363	0.29	1.66978e-264	0
RPS4Y1	1.17375e-267	0.38318	0.462	0.377	7.47502e-263	0
CCDC144A	1.58098e-267	1.11639	0.158	0.101	1.00685e-262	0
AK4	2.02093e-267	0.571894	0.361	0.289	1.28703e-262	0
GLDN	3.13567e-266	0.788402	0.252	0.183	1.99695e-261	0
MN1	1.32974e-265	0.909739	0.203	0.139	8.46845e-261	0
BTG1	1.46526e-265	0.281194	0.921	0.927	9.33151e-261	0
AL021155.5	2.31458e-265	1.02833	0.107	0.06	1.47404e-260	0
ANXA4	3.16293e-263	0.425082	0.547	0.492	2.01431e-258	0
TNRC6A	1.49731e-261	0.715894	0.368	0.302	9.53559e-257	0
MBNL1	2.35504e-261	0.349653	0.706	0.683	1.49981e-256	0
PSMA6	2.13009e-259	0.480377	0.324	0.243	1.35655e-254	0
STBD1	2.81864e-259	1.02857	0.116	0.067	1.79505e-254	0
CAMK1D	2.92822e-257	0.690903	0.34	0.271	1.86483e-252	0
HMGN2	9.79734e-257	0.293587	0.711	0.694	6.23944e-252	0
SETBP1	1.09659e-256	0.853373	0.222	0.157	6.98364e-252	0
ZNF280D	3.07965e-256	0.78461	0.28	0.212	1.96128e-251	0
KDELR3	2.74847e-255	0.583339	0.385	0.316	1.75036e-250	0
MRPS28	3.42809e-255	0.768499	0.293	0.227	2.18318e-250	0
SAMD11	3.54547e-255	1.11236	0.122	0.072	2.25793e-250	0
ZRANB2	9.77483e-254	0.47214	0.569	0.521	6.2251e-249	0
AC097534.2	8.03796e-253	0.861123	0.241	0.176	5.11897e-248	0
ITGA11	6.29447e-251	0.710879	0.238	0.171	4.00863e-246	0
CYP51A1	1.38177e-248	0.473003	0.289	0.213	8.79983e-244	0
IFI27L2	1.481e-248	0.375832	0.626	0.586	9.43176e-244	0
MED13L	3.8549e-248	0.588007	0.444	0.385	2.45499e-243	0
TRPM4	1.90435e-247	1.19598	0.119	0.071	1.21279e-242	0
AFF3	2.17392e-247	0.905543	0.2	0.139	1.38446e-242	0
PKIG	2.69481e-246	0.524803	0.469	0.415	1.71619e-241	0
ROBO1	6.61715e-246	0.850837	0.227	0.163	4.21413e-241	0
HIST2H2AC	1.98393e-245	0.72375	0.264	0.197	1.26347e-240	0
B4GALT6	8.84083e-244	1.21185	0.117	0.07	5.63028e-239	0
KDM7A-DT	1.29259e-243	0.875614	0.105	0.059	8.23186e-239	0
ELK3	3.09217e-243	0.528172	0.417	0.35	1.96925e-238	0
CAMSAP2	1.58241e-241	0.624857	0.397	0.338	1.00776e-236	0
NOL3	3.35326e-239	0.853642	0.334	0.271	2.13552e-234	0
AC068888.1	9.14923e-239	0.581647	0.386	0.319	5.82669e-234	0
GHR	8.98524e-238	0.874205	0.176	0.118	5.72225e-233	0
DSEL	3.75691e-235	0.808068	0.3	0.237	2.39259e-230	0
LNPEP	7.99178e-235	0.65855	0.348	0.283	5.08957e-230	0
KRT8	2.63263e-234	0.67835	0.257	0.191	1.67659e-229	0
RASL12	5.7038e-233	0.961271	0.15	0.097	3.63246e-228	0
MSMP	1.78349e-232	2.08237	0.135	0.085	1.13582e-227	0
NFATC2	2.0515e-230	0.890781	0.262	0.197	1.3065e-225	0
HILPDA	3.00029e-230	1.47345	0.385	0.322	1.91073e-225	0
PSMA2	1.34944e-229	0.405223	0.537	0.492	8.59393e-225	0
RHOBTB3	5.2392e-229	0.446694	0.564	0.507	3.33659e-224	0
LTBP2	1.07444e-228	0.383461	0.403	0.328	6.84255e-224	0
PJA2	8.24428e-228	0.378866	0.622	0.598	5.25037e-223	0
MTFP1	1.94086e-227	0.925375	0.101	0.058	1.23604e-222	0
SFT2D2	2.1961e-226	0.6337	0.401	0.345	1.39858e-221	0
EGR1	1.19756e-225	0.34034	0.742	0.682	7.62664e-221	0
MSRB2	2.23203e-225	0.551712	0.436	0.382	1.42147e-220	0
AIG1	1.62525e-224	0.527473	0.473	0.425	1.03504e-219	0
GOLGB1	2.30002e-223	0.396698	0.637	0.615	1.46477e-218	0
SNRPD2	3.75474e-223	0.298038	0.749	0.742	2.39121e-218	0
COX20	1.29591e-222	0.424239	0.549	0.512	8.25303e-218	0
DMKN	2.36517e-222	0.624546	0.327	0.262	1.50626e-217	0
GLG1	1.23088e-219	0.459938	0.523	0.482	7.83888e-215	0
EIF4E3	7.879e-219	0.969856	0.157	0.104	5.01774e-214	0
CUX1	1.24782e-217	0.530487	0.421	0.362	7.94675e-213	0
TCEAL8	7.62675e-216	0.521708	0.474	0.429	4.85709e-211	0
HAUS4	1.6214e-214	0.888831	0.152	0.1	1.03259e-209	0
ATXN7	2.92402e-214	0.617727	0.163	0.107	1.86216e-209	0
DDT	7.58066e-213	0.374539	0.594	0.558	4.82774e-208	0
GALNT15	1.66128e-212	0.350471	0.504	0.445	1.05799e-207	0
RNF217	6.60739e-210	0.749757	0.312	0.254	4.20792e-205	0
DPYD	1.96323e-208	0.778789	0.221	0.163	1.25029e-203	0
MEF2C	4.05493e-208	0.414687	0.357	0.291	2.58238e-203	0
CPNE3	1.50239e-206	0.455526	0.539	0.508	9.568e-202	0
ANAPC16	1.56357e-206	0.279788	0.699	0.685	9.95762e-202	0
ERRFI1	4.61668e-206	0.622079	0.644	0.617	2.94013e-201	0
HEIH	2.22373e-205	0.6555	0.146	0.094	1.41618e-200	0
HIST1H1A	2.77379e-204	0.874162	0.158	0.107	1.76649e-199	0
GABRA4	2.39552e-203	0.806591	0.154	0.102	1.52559e-198	0
ACOT13	2.30487e-202	0.663507	0.376	0.323	1.46786e-197	0
PLAAT4	9.96193e-201	0.594509	0.116	0.071	6.34425e-196	0
TPD52L1	1.14403e-200	0.33791	0.523	0.467	7.28575e-196	0
TMEM14A	1.28615e-200	0.73282	0.28	0.221	8.19083e-196	0
FOXO1	5.77498e-198	0.492766	0.441	0.385	3.6778e-193	0
GALNT16	2.2611e-196	0.899043	0.133	0.086	1.43998e-191	0
PET100	1.59635e-195	0.503285	0.472	0.426	1.01664e-190	0
COBLL1	3.70902e-194	0.55811	0.386	0.331	2.36209e-189	0
PROS1	9.35524e-194	0.625315	0.278	0.216	5.95788e-189	0
TIMP4	2.48175e-192	0.461041	0.451	0.393	1.5805e-187	0
ERVK3-1	1.36186e-190	0.69989	0.217	0.161	8.67299e-186	0
CST6	2.22887e-190	0.927915	0.139	0.092	1.41945e-185	0
HS3ST1	2.59822e-190	1.06519	0.117	0.074	1.65467e-185	0
NFIC	3.62393e-188	0.283322	0.682	0.648	2.3079e-183	0
NME3	4.84964e-187	0.420297	0.51	0.462	3.08849e-182	0
CRISPLD1	5.21726e-187	0.263623	0.295	0.227	3.32261e-182	0
NPDC1	7.23899e-187	0.315463	0.418	0.359	4.61015e-182	0
NME4	1.6821e-185	0.459781	0.43	0.376	1.07125e-180	0
NDUFB4	1.38194e-184	0.261656	0.763	0.763	8.80089e-180	0
TMEM87B	2.29559e-184	0.792905	0.189	0.137	1.46195e-179	0
ESR1	2.31946e-183	1.13947	0.107	0.067	1.47715e-178	0
SLC26A2	9.07762e-182	0.743606	0.284	0.231	5.78108e-177	0
TMEM44-AS1	2.53932e-181	0.998994	0.117	0.075	1.61716e-176	0
AGPAT4	3.13916e-181	0.645361	0.24	0.183	1.99918e-176	0
TMEM47	5.65387e-180	0.578949	0.345	0.29	3.60066e-175	0
ITGB8	2.11648e-179	0.454028	0.227	0.166	1.34788e-174	0
POLR2J3	7.97787e-179	0.543076	0.178	0.124	5.0807e-174	0
SEPTIN9	1.69508e-178	0.509728	0.137	0.089	1.07951e-173	0
PKD2	1.85698e-178	0.651835	0.329	0.277	1.18262e-173	0
KCNQ5	4.00133e-178	0.992786	0.122	0.08	2.54825e-173	0
ADSSL1	8.02471e-178	0.515336	0.288	0.227	5.11054e-173	0
ANK3	7.42104e-177	0.626299	0.315	0.257	4.72609e-172	0
TIPARP	1.35258e-176	0.507467	0.494	0.452	8.61391e-172	0
SMAD9	4.06793e-176	0.831829	0.173	0.124	2.59066e-171	0
MAGI1	7.40561e-176	0.874804	0.144	0.098	4.71626e-171	0
KIF22	1.2976e-175	0.75118	0.298	0.246	8.26376e-171	0
LSM5	3.28737e-175	0.456827	0.527	0.503	2.09356e-170	0
PRICKLE2	2.13978e-174	0.811285	0.172	0.123	1.36272e-169	0
PLA2R1	2.67581e-174	0.939943	0.129	0.086	1.70409e-169	0
SSTR2	1.12929e-173	0.627025	0.213	0.159	7.19187e-169	0
SERBP1	5.59634e-173	0.27979	0.78	0.8	3.56403e-168	0
PRDM5	9.86483e-172	0.997637	0.13	0.087	6.28242e-167	0
TWSG1	1.40146e-169	0.473842	0.437	0.392	8.92518e-165	0
CNPY2	4.77047e-169	0.352491	0.568	0.545	3.03807e-164	0
CEP126	1.51728e-168	0.635266	0.308	0.254	9.6628e-164	0
VWA1	1.37558e-167	0.460196	0.335	0.278	8.76037e-163	0
HDAC9	2.07863e-166	0.869064	0.154	0.108	1.32377e-161	0
SLC29A1	8.66209e-166	0.340537	0.497	0.444	5.51645e-161	0
FXYD2	8.8365e-166	0.861908	0.103	0.065	5.62753e-161	0
HSPB6	5.4702e-164	0.550069	0.211	0.157	3.4837e-159	0
LOXL3	6.23106e-164	0.931984	0.156	0.111	3.96825e-159	0
RSPO2	1.71904e-163	1.23049	0.162	0.118	1.09477e-158	0
DDX3Y	1.89666e-163	0.417714	0.308	0.244	1.20789e-158	0
AASS	1.81596e-161	0.692788	0.194	0.143	1.1565e-156	0
UFSP2	2.59087e-161	0.641052	0.333	0.284	1.64999e-156	0
CDR1	1.3028e-160	0.601689	0.254	0.2	8.29687e-156	0
HSBP1L1	1.96488e-160	0.732819	0.23	0.18	1.25133e-155	0
RFTN2	2.20763e-160	0.799604	0.206	0.157	1.40593e-155	0
ATF7IP2	5.07008e-158	0.758487	0.206	0.157	3.22888e-153	0
TNRC6B	7.80057e-158	0.447842	0.469	0.427	4.96779e-153	0
PTGS1	8.71378e-158	0.830803	0.138	0.095	5.54937e-153	0
HOXD-AS2	1.23624e-156	0.946797	0.16	0.116	7.873e-152	0
CDC42EP3	2.31335e-156	0.541875	0.264	0.211	1.47326e-151	0
SDC3	2.65216e-156	0.834111	0.157	0.112	1.68903e-151	0
MRPS21	1.06576e-155	0.336382	0.635	0.622	6.78732e-151	0
MEF2A	1.76827e-155	0.390262	0.554	0.524	1.12612e-150	0
ZNF462	2.43333e-154	0.904354	0.125	0.084	1.54966e-149	0
SPECC1	8.96753e-154	0.550478	0.361	0.314	5.71097e-149	0
ICK	1.7154e-153	0.781636	0.206	0.158	1.09245e-148	0
DLX4	3.57076e-153	0.837234	0.115	0.076	2.27404e-148	0
SIPA1L1	5.85477e-153	0.653073	0.307	0.259	3.72861e-148	0
RARB	4.04303e-152	0.980944	0.102	0.066	2.5748e-147	0
SLC16A7	4.27228e-152	0.38225	0.468	0.422	2.7208e-147	0
SMAD6	7.36903e-152	0.882455	0.135	0.093	4.69297e-147	0
FNDC3A	2.09904e-151	0.538723	0.37	0.325	1.33678e-146	0
GSTO2	1.09925e-150	0.947785	0.135	0.094	7.00057e-146	0
GALNT8	4.63952e-150	0.819371	0.179	0.133	2.95468e-145	0
RNMT	9.96014e-150	0.451633	0.513	0.485	6.34311e-145	0
CEMIP2	1.84812e-146	0.629241	0.297	0.249	1.17698e-141	0
GALNT2	2.12209e-146	0.421742	0.372	0.324	1.35145e-141	0
GOLGA8B	3.45467e-146	0.890146	0.143	0.101	2.20011e-141	0
PEG3	1.33362e-145	1.25053	0.117	0.08	8.49315e-141	0
NPHP3	1.46119e-144	0.728104	0.233	0.185	9.3056e-140	0
HCFC1R1	6.52329e-144	0.414378	0.424	0.375	4.15436e-139	0
REEP3	1.24863e-143	0.401142	0.511	0.482	7.95187e-139	0
HHIP-AS1	1.82873e-143	0.997113	0.105	0.07	1.16463e-138	0
MBNL2	3.82077e-143	0.576915	0.34	0.293	2.43326e-138	0
IGIP	8.96936e-143	0.96265	0.106	0.07	5.71214e-138	0
FMC1	2.73004e-141	0.616025	0.277	0.228	1.73862e-136	0
SNHG3	3.44091e-141	0.546902	0.137	0.094	2.19134e-136	0
TCEAL9	1.75899e-140	0.277973	0.61	0.579	1.12022e-135	0
TP53TG1	3.02711e-138	0.685406	0.24	0.193	1.92781e-133	0
ATP5MPL	2.33579e-137	0.286882	0.66	0.641	1.48755e-132	0
ANKRD37	3.74849e-137	0.993123	0.408	0.37	2.38722e-132	0
TENT5C	4.10379e-137	0.801075	0.169	0.126	2.6135e-132	0
MCEE	2.31897e-135	0.700373	0.235	0.189	1.47684e-130	0
NTN4	9.24841e-135	0.602169	0.294	0.247	5.88985e-130	0
HACD4	4.58533e-134	0.699473	0.177	0.133	2.92017e-129	0
PER3	4.95524e-134	0.614715	0.292	0.246	3.15574e-129	0
AC100810.1	5.29677e-133	0.582883	0.306	0.26	3.37325e-128	0
NRIP1	1.42161e-132	0.675254	0.32	0.278	9.05353e-128	0
SNAPC1	1.84578e-132	0.497648	0.471	0.438	1.17548e-127	0
AHI1	3.45427e-132	0.403629	0.547	0.524	2.19986e-127	0
RFX3	6.20144e-132	1.0448	0.103	0.069	3.94939e-127	0
ENOSF1	1.3187e-131	0.715895	0.263	0.219	8.39817e-127	0
AKAP9	3.37979e-131	0.352017	0.595	0.587	2.15242e-126	0
HAS2-AS1	9.16249e-131	0.984356	0.109	0.074	5.83513e-126	0
COG6	2.02521e-130	0.737255	0.201	0.157	1.28976e-125	0
PRKDC	1.59766e-129	0.394316	0.464	0.431	1.01747e-124	0
PLEKHA1	3.69514e-129	0.432178	0.46	0.428	2.35325e-124	0
CYP7B1	4.87651e-129	0.756571	0.102	0.068	3.10561e-124	0
C15orf61	1.2605e-128	0.536865	0.387	0.35	8.02749e-124	0
LINC00467	3.52754e-128	0.844723	0.139	0.1	2.24651e-123	0
UQCRQ	2.24231e-126	0.319065	0.627	0.619	1.42802e-121	0
FOXD2	3.97621e-126	0.870626	0.128	0.091	2.53225e-121	0
EFNA5	4.57054e-126	0.66881	0.199	0.155	2.91075e-121	0
IFT20	1.68758e-125	0.49072	0.405	0.371	1.07473e-120	0
GPS2	4.03355e-125	0.507984	0.293	0.245	2.56877e-120	0
ZC3H8	9.89905e-125	0.74201	0.229	0.186	6.30421e-120	0
ALDH1A2	4.38227e-124	0.642736	0.189	0.145	2.79085e-119	0
PCDH9	3.73022e-123	0.530833	0.287	0.24	2.37559e-118	0
MAGED1	5.17382e-122	0.443745	0.346	0.302	3.29495e-117	0
GMDS-DT	6.04191e-122	0.950521	0.109	0.075	3.84779e-117	0
ETV1	6.83037e-122	0.884204	0.113	0.079	4.34992e-117	0
RCOR3	1.58935e-121	0.656278	0.245	0.201	1.01218e-116	0
GOLGA8A	2.98552e-121	0.750842	0.165	0.124	1.90133e-116	0
EGLN3	3.94535e-120	0.505762	0.333	0.285	2.5126e-115	0
PRXL2A	6.53103e-120	0.261247	0.108	0.072	4.15929e-115	0
TRPC1	8.81313e-119	0.8256	0.155	0.116	5.61264e-114	0
MYL6B	1.9587e-118	0.425929	0.432	0.399	1.2474e-113	0
SNHG18	1.81492e-117	0.636081	0.255	0.211	1.15583e-112	0
FAM114A1	2.6435e-117	0.275004	0.553	0.525	1.68351e-112	0
RDX	5.16053e-117	0.365387	0.455	0.426	3.28648e-112	0
HMGN3	4.10431e-116	0.347884	0.493	0.461	2.61383e-111	0
HCG11	6.44039e-115	0.677766	0.196	0.155	4.10156e-110	0
ARFGEF2	8.09871e-115	0.638121	0.23	0.187	5.15766e-110	0
PTGFRN	9.47447e-115	0.557638	0.141	0.103	6.03382e-110	0
IER3IP1	1.0674e-114	0.39531	0.489	0.47	6.79775e-110	0
ARHGAP5	2.91206e-113	0.478654	0.4	0.368	1.85454e-108	0
NUTM2A-AS1	4.01616e-113	0.666548	0.22	0.179	2.55769e-108	0
SNRPN	5.43746e-113	0.328509	0.503	0.474	3.46285e-108	0
AC025164.1	3.76028e-112	0.73481	0.162	0.124	2.39473e-107	0
LUC7L3	4.34225e-112	0.3283	0.606	0.599	2.76536e-107	0
TSPAN4	4.51388e-112	0.269119	0.511	0.472	2.87467e-107	0
LRRC75A	8.00065e-112	0.863904	0.166	0.128	5.09521e-107	0
DLX5	9.25915e-112	0.396923	0.288	0.239	5.89669e-107	0
INTU	1.07477e-111	0.87304	0.161	0.123	6.84465e-107	0
ROM1	1.24298e-111	0.773811	0.187	0.148	7.91591e-107	0
HRCT1	6.72719e-111	0.645558	0.167	0.128	4.28421e-106	0
CDKN1C	9.02385e-111	0.445591	0.474	0.429	5.74684e-106	0
ADAMTS9-AS2	2.7771e-110	0.983815	0.101	0.069	1.7686e-105	0
COL8A2	1.46944e-108	0.513594	0.246	0.202	9.35814e-104	0
ZNF519	4.96114e-108	0.991225	0.102	0.071	3.1595e-103	0
KIAA1549	1.70088e-107	0.793412	0.128	0.094	1.08321e-102	0
AC092807.3	1.26809e-105	0.956601	0.104	0.073	8.07582e-101	0
ZSCAN16-AS1	3.6237e-105	0.600203	0.285	0.246	2.30775e-100	0
CHMP3	6.30113e-105	0.366221	0.464	0.436	4.01288e-100	0
RTL8C	7.0035e-105	0.391152	0.389	0.351	4.46018e-100	0
BDH2	1.75707e-104	0.392141	0.453	0.424	1.11899e-99	0
PLSCR4	3.35584e-104	0.479724	0.265	0.222	2.13717e-99	0
EGLN1	8.50144e-104	0.49389	0.364	0.33	5.41414e-99	0
UBXN4	1.03427e-103	0.264241	0.648	0.648	6.58677e-99	0
MTR	8.93451e-103	0.605063	0.23	0.19	5.68994e-98	0
JAK2	1.12882e-102	0.707428	0.172	0.134	7.18889e-98	0
MUC1	1.5884e-102	0.81115	0.149	0.114	1.01157e-97	0
PTPRD-AS1	2.19091e-102	0.824157	0.136	0.101	1.39528e-97	0
SLC66A3	3.40375e-102	0.444868	0.126	0.09	2.16768e-97	0
RNF212	4.98518e-102	0.92168	0.124	0.091	3.17481e-97	0
GALNT10	4.55231e-101	0.555652	0.249	0.208	2.89914e-96	0
DDAH1	9.39812e-101	0.784698	0.174	0.138	5.98519e-96	0
MOXD1	1.7583e-100	0.745619	0.1	0.07	1.11977e-95	0
PTN	6.50778e-100	0.640771	0.193	0.153	4.14448e-95	0
KAT6B	3.44023e-99	0.539263	0.286	0.247	2.19091e-94	0
ANK2	1.78576e-98	0.418854	0.204	0.162	1.13726e-93	0
FAM200B	2.77492e-98	0.47968	0.388	0.358	1.76721e-93	0
AARSD1	3.08137e-98	0.643227	0.131	0.096	1.96237e-93	0
SKI	3.14381e-98	0.403686	0.373	0.335	2.00213e-93	0
CYP4V2	6.64359e-98	0.684195	0.153	0.118	4.23097e-93	0
SRRM1	1.07083e-97	0.277275	0.654	0.659	6.81957e-93	0
LRP6	3.9217e-97	0.628279	0.243	0.206	2.49754e-92	0
HMGN5	4.16075e-96	0.775544	0.164	0.129	2.64977e-91	0
CHD9	4.5914e-95	0.323649	0.579	0.576	2.92403e-90	0
PER2	4.66178e-95	0.540682	0.273	0.234	2.96886e-90	0
IQCA1	7.61398e-95	0.853364	0.123	0.091	4.84896e-90	0
MYO1D	2.46925e-94	0.480414	0.338	0.302	1.57254e-89	0
SLC1A4	2.61827e-94	0.554851	0.288	0.252	1.66745e-89	0
SLC16A4	1.27758e-93	0.67122	0.176	0.139	8.13629e-89	0
TMED4	9.81978e-93	0.34126	0.528	0.516	6.25373e-88	0
ASB3	9.87853e-93	0.753485	0.115	0.084	6.29114e-88	0
COLGALT2	3.15173e-92	0.272011	0.395	0.35	2.00718e-87	0
RNASEH2C	4.47257e-92	0.268064	0.576	0.57	2.84836e-87	0
HMGN4	7.94274e-92	0.517458	0.158	0.121	5.05833e-87	0
CARMIL1	3.44924e-91	0.785401	0.143	0.11	2.19665e-86	0
EIF4EBP3	5.67539e-91	0.530925	0.104	0.074	3.61437e-86	0
MTG1	1.32932e-90	0.641853	0.107	0.076	8.46576e-86	0
MORC4	2.32584e-90	0.606193	0.211	0.174	1.48121e-85	0
AC010642.2	3.05236e-90	0.629333	0.258	0.224	1.9439e-85	0
ITGA1	1.32535e-89	0.457139	0.233	0.193	8.44047e-85	0
PIK3R3	1.77513e-89	0.615795	0.272	0.236	1.13049e-84	0
ATP5ME	6.95532e-89	0.252262	0.645	0.637	4.4295e-84	0
ZNF292	9.90286e-88	0.422194	0.417	0.389	6.30664e-83	0
GSTA4	4.34248e-87	0.497203	0.303	0.268	2.76551e-82	0
PLEKHA4	4.35534e-87	0.537055	0.225	0.187	2.7737e-82	0
NUDT3	2.79649e-86	0.639688	0.221	0.186	1.78094e-81	0
FAM229B	5.90821e-86	0.531869	0.295	0.262	3.76264e-81	0
PRXL2C	9.45492e-86	0.386011	0.126	0.093	6.02136e-81	0
CASK	1.15414e-85	0.613901	0.231	0.196	7.35015e-81	0
BEX5	3.26046e-85	0.614804	0.204	0.169	2.07643e-80	0
ABI2	6.82013e-85	0.471416	0.401	0.376	4.3434e-80	0
TMEM30A	7.83677e-84	0.250744	0.515	0.492	4.99084e-79	0
PTPN14	1.03112e-83	0.443927	0.291	0.255	6.56666e-79	0
CENPC	1.16173e-83	0.500859	0.327	0.294	7.39848e-79	0
C1orf50	1.14541e-82	0.711832	0.107	0.078	7.29453e-78	0
FAN1	1.65033e-82	0.717228	0.167	0.134	1.05101e-77	0
TM9SF3	1.73734e-82	0.277027	0.574	0.569	1.10642e-77	0
ARHGAP29	4.41247e-82	0.570962	0.288	0.253	2.81008e-77	0
TMEM106B	6.07945e-82	0.462453	0.378	0.353	3.8717e-77	0
GOLIM4	6.47076e-82	0.251113	0.536	0.517	4.1209e-77	0
PKD1	1.49563e-81	0.459798	0.33	0.297	9.52493e-77	0
ANKRD65	1.96313e-81	0.735737	0.134	0.103	1.25022e-76	0
AGGF1	2.63356e-81	0.5353	0.165	0.13	1.67718e-76	0
BEX4	2.84196e-81	0.346518	0.42	0.389	1.8099e-76	0
SLC14A1	4.06528e-81	0.44996	0.169	0.134	2.58897e-76	0
TUT4	5.93284e-81	0.538159	0.319	0.29	3.77833e-76	0
KIAA0355	9.66965e-81	0.490744	0.22	0.184	6.15811e-76	0
NOTCH2	2.1654e-80	0.337992	0.434	0.408	1.37904e-75	0
RGN	9.54677e-79	0.76258	0.123	0.093	6.07986e-74	0
ASPH	1.55139e-78	0.252946	0.553	0.537	9.88003e-74	0
ASAP2	1.99129e-78	0.416909	0.353	0.321	1.26815e-73	0
MIR497HG	1.29846e-77	0.633256	0.192	0.159	8.26923e-73	0
AL158152.1	5.35426e-77	0.736982	0.101	0.074	3.40986e-72	0
CCDC14	5.83768e-77	0.592249	0.22	0.186	3.71773e-72	0
RABGEF1	1.05599e-76	0.505735	0.204	0.17	6.72506e-72	0
KIAA2026	1.45238e-76	0.538438	0.313	0.284	9.2495e-72	0
CRYBG3	9.50739e-76	0.587245	0.202	0.169	6.05478e-71	0
DYNC1I2	1.24723e-75	0.303503	0.514	0.502	7.94299e-71	0
FOXD1	2.73284e-75	0.52568	0.269	0.237	1.74041e-70	0
SRPX2	1.50023e-74	0.375607	0.38	0.351	9.55422e-70	0
SPATS2L	5.17435e-74	0.383125	0.41	0.387	3.29529e-69	0
MON2	1.6956e-73	0.570664	0.26	0.228	1.07984e-68	0
MPP6	1.88496e-73	0.451615	0.302	0.271	1.20044e-68	0
VEGFA	3.07959e-73	1.10117	0.573	0.572	1.96123e-68	0
PBX1	3.44171e-73	0.527237	0.205	0.172	2.19185e-68	0
HK2	3.48839e-73	0.517282	0.163	0.132	2.22158e-68	0
ANKRD50	7.01852e-73	0.718607	0.123	0.095	4.46974e-68	0
FKBP9	7.87824e-73	0.429336	0.301	0.267	5.01726e-68	0
ATP10D	2.01383e-72	0.635924	0.194	0.162	1.28251e-67	0
GET3	5.49761e-72	0.333433	0.13	0.099	3.50115e-67	0
AIMP1	5.59828e-72	0.321983	0.496	0.483	3.56526e-67	0
C10orf105	6.51212e-72	0.555078	0.11	0.082	4.14725e-67	0
BMPR1A	2.26844e-71	0.672505	0.158	0.128	1.44465e-66	0
RUNX1	2.89095e-71	0.29807	0.526	0.513	1.8411e-66	0
TTN-AS1	2.42715e-70	0.846801	0.103	0.078	1.54573e-65	0
CHSY1	1.18225e-69	0.609751	0.291	0.265	7.52916e-65	0
PSMB10	3.09668e-69	0.404595	0.181	0.147	1.97212e-64	0
ARHGEF10	3.27678e-69	0.570914	0.135	0.105	2.08681e-64	0
PHYHD1	3.43794e-69	0.573475	0.159	0.128	2.18945e-64	0
SYNM	4.72036e-69	0.439505	0.27	0.238	3.00616e-64	0
BBX	8.6077e-69	0.330456	0.483	0.474	5.48181e-64	0
ACBD3	1.23643e-68	0.324227	0.499	0.49	7.87423e-64	0
ATR	2.44041e-68	0.703679	0.11	0.084	1.55418e-63	0
DOCK7	2.77276e-68	0.625299	0.221	0.191	1.76583e-63	0
PTPA	4.76068e-68	0.485276	0.256	0.225	3.03184e-63	0
MTUS1	6.5721e-68	0.33442	0.323	0.292	4.18544e-63	0
KITLG	7.9884e-68	0.618407	0.163	0.133	5.08741e-63	0
C4orf47	7.48752e-67	0.864669	0.101	0.077	4.76843e-62	0
SMO	9.40889e-67	0.767145	0.134	0.107	5.99205e-62	0
PAPSS1	1.36537e-66	0.453093	0.337	0.312	8.69534e-62	0
SMARCA1	1.39977e-66	0.413261	0.326	0.298	8.91441e-62	0
AUTS2	2.25443e-66	0.443255	0.338	0.312	1.43573e-61	0
HECTD2	4.26186e-66	0.576334	0.26	0.231	2.71416e-61	0
SMARCA2	4.86613e-66	0.372132	0.361	0.333	3.099e-61	0
PLA2G12A	2.39768e-65	0.534782	0.173	0.142	1.52696e-60	0
UTRN	8.52634e-65	0.286402	0.381	0.351	5.43e-60	0
PSD3	2.50796e-64	0.250615	0.466	0.442	1.59719e-59	0
METRN	4.25667e-64	0.352438	0.358	0.33	2.71086e-59	0
OSBPL1A	8.65285e-64	0.397631	0.305	0.274	5.51057e-59	0
NHLRC3	9.3775e-63	0.574539	0.189	0.159	5.97206e-58	0
AP002360.1	1.35931e-62	0.701921	0.14	0.113	8.65679e-58	0
ANKAR	6.78721e-62	0.799005	0.115	0.09	4.32243e-57	0
FGD5-AS1	7.37022e-62	0.374587	0.399	0.38	4.69373e-57	0
TMEM237	9.53854e-62	0.472887	0.28	0.251	6.07462e-57	0
ZNF532	5.00929e-61	0.606348	0.183	0.155	3.19017e-56	0
EVI2A	6.21656e-61	0.37295	0.169	0.138	3.95902e-56	0
MSI2	8.50048e-61	0.377423	0.348	0.321	5.41353e-56	0
USP6NL	9.43502e-61	0.660901	0.139	0.113	6.00869e-56	0
CA11	1.6499e-60	0.753719	0.123	0.098	1.05074e-55	0
DYNC2LI1	3.03838e-60	0.591461	0.219	0.191	1.93499e-55	0
UFL1	3.41778e-60	0.414788	0.349	0.325	2.17661e-55	0
TBC1D8B	7.15442e-60	0.604896	0.169	0.141	4.55629e-55	0
SOX15	9.53218e-60	0.826125	0.116	0.092	6.07057e-55	0
IRF2BP2	1.73342e-59	0.295014	0.47	0.45	1.10393e-54	0
ARL2BP	3.4669e-59	0.387322	0.385	0.367	2.2079e-54	0
IGFBP2	6.0504e-59	0.256525	0.145	0.116	3.8532e-54	0
SH3YL1	5.21868e-58	0.596883	0.173	0.146	3.32352e-53	0
CLSTN1	1.07998e-57	0.384103	0.392	0.375	6.87786e-53	0
NDUFB1	3.05387e-57	0.297126	0.574	0.584	1.94486e-52	0
IL13RA1	3.93319e-57	0.293927	0.451	0.437	2.50485e-52	0
SAP30	3.96287e-57	0.447004	0.453	0.444	2.52375e-52	0
P4HA3	4.8741e-57	0.58288	0.142	0.115	3.10407e-52	0
SLC41A3	6.6516e-57	0.511798	0.229	0.201	4.23607e-52	0
CASD1	8.51499e-57	0.593054	0.149	0.123	5.42277e-52	0
TMEM263	1.3891e-56	0.2906	0.483	0.47	8.84646e-52	0
TMEM42	2.44811e-56	0.526238	0.224	0.196	1.55908e-51	0
SOBP	2.58311e-56	0.460375	0.301	0.277	1.64505e-51	0
PIEZO1	4.61894e-56	0.498765	0.289	0.264	2.94157e-51	0
FDX2	1.07977e-55	0.589022	0.11	0.086	6.87652e-51	0
TMEM14B	1.31945e-55	0.277292	0.544	0.55	8.40289e-51	0
ZBED5-AS1	1.83236e-55	0.699173	0.127	0.103	1.16694e-50	0
EPS8L2	2.05209e-55	0.434877	0.28	0.253	1.30687e-50	0
TIA1	2.86285e-55	0.531795	0.196	0.167	1.82321e-50	0
NUBPL	4.16885e-55	0.674485	0.119	0.095	2.65493e-50	0
SPRED1	5.07822e-55	0.439992	0.259	0.232	3.23407e-50	0
TCTEX1D2	5.86053e-55	0.611055	0.191	0.165	3.73228e-50	0
AC025159.1	1.34432e-54	0.734323	0.114	0.091	8.56131e-50	0
DSE	2.17665e-54	0.285802	0.395	0.372	1.3862e-49	0
PRKCA	2.79826e-53	0.390125	0.345	0.323	1.78207e-48	0
PHC3	7.7068e-53	0.496855	0.217	0.189	4.90808e-48	0
GAREM1	9.20185e-53	0.689551	0.145	0.121	5.8602e-48	0
KIAA0586	1.27561e-52	0.653088	0.154	0.128	8.12373e-48	0
SLC39A6	1.64649e-52	0.373997	0.384	0.368	1.04857e-47	0
SDCCAG8	3.77946e-52	0.456572	0.273	0.248	2.40695e-47	0
KDM5B	6.70702e-52	0.424616	0.31	0.287	4.27137e-47	0
PDGFD	6.9689e-52	0.348531	0.165	0.137	4.43814e-47	0
STRN	7.38321e-52	0.552551	0.178	0.152	4.702e-47	0
CCNG2	1.13203e-51	0.366741	0.306	0.279	7.20936e-47	0
SLC25A36	1.60917e-51	0.275312	0.496	0.487	1.0248e-46	0
YAP1	4.29517e-51	0.393347	0.322	0.299	2.73538e-46	0
GABPB1-AS1	4.39385e-51	0.456507	0.318	0.297	2.79822e-46	0
MTMR11	8.70944e-51	0.683603	0.116	0.093	5.54661e-46	0
ITGAE	9.96533e-51	0.431451	0.351	0.333	6.34642e-46	0
NHLRC2	2.2316e-50	0.607787	0.163	0.138	1.4212e-45	0
MTHFS	4.72264e-50	0.433733	0.214	0.187	3.00761e-45	0
BORCS7	1.63722e-49	0.322513	0.457	0.453	1.04267e-44	0
ADSL	1.91319e-49	0.468494	0.139	0.113	1.21841e-44	0
EPHX2	5.66383e-49	0.653433	0.124	0.101	3.60701e-44	0
DZIP1	9.64146e-49	0.610681	0.121	0.098	6.14017e-44	0
ZC3H6	1.35715e-48	0.483308	0.254	0.229	8.64301e-44	0
PCYOX1	1.47826e-48	0.280106	0.397	0.375	9.41427e-44	0
CCDC88A	9.16391e-48	0.273575	0.409	0.391	5.83603e-43	0
DNAH11	9.64593e-48	0.656075	0.106	0.084	6.14301e-43	0
CPPED1	1.90503e-47	0.6054	0.146	0.122	1.21322e-42	0
GTF2I	1.99721e-47	0.306318	0.427	0.414	1.27192e-42	0
SNHG19	2.86894e-47	0.540826	0.188	0.163	1.82708e-42	0
DPY19L4	3.76469e-47	0.568436	0.173	0.149	2.39754e-42	0
SESN3	4.81336e-47	0.493698	0.232	0.208	3.06539e-42	0
LNX1	7.54809e-47	0.632964	0.136	0.113	4.807e-42	0
STK3	8.38255e-47	0.561301	0.228	0.205	5.33843e-42	0
DAAM2	8.5145e-47	0.593793	0.165	0.141	5.42246e-42	0
RECK	3.06616e-46	0.505188	0.181	0.156	1.95268e-41	0
PPIP5K2	4.01864e-46	0.485961	0.282	0.262	2.55927e-41	0
PNKD	5.21561e-46	0.281996	0.445	0.431	3.32156e-41	0
CCDC151	6.2799e-46	0.619605	0.172	0.148	3.99936e-41	0
FGFRL1	9.13399e-46	0.269655	0.403	0.38	5.81698e-41	0
AL355075.4	1.07154e-45	0.54147	0.155	0.131	6.82409e-41	0
CDK14	2.04946e-45	0.522376	0.16	0.136	1.3052e-40	0
AC005261.1	2.23207e-45	0.558845	0.163	0.14	1.42149e-40	0
TMEM98	4.85946e-45	0.303669	0.397	0.378	3.09475e-40	0
DZIP3	6.7713e-45	0.635879	0.111	0.09	4.31231e-40	0
TTBK2	6.81847e-45	0.554396	0.173	0.149	4.34234e-40	0
GOLGA2	1.14505e-44	0.286593	0.456	0.449	7.29225e-40	0
OGA	1.21723e-44	0.407739	0.301	0.28	7.75193e-40	0
NXN	1.70871e-44	0.521782	0.115	0.093	1.08819e-39	0
B3GNT9	1.89098e-44	0.6534	0.108	0.087	1.20427e-39	0
TMEM256	2.28663e-44	0.358199	0.389	0.373	1.45624e-39	0
AMOTL1	5.53098e-44	0.488196	0.229	0.206	3.52241e-39	0
CKLF	5.79924e-44	0.370909	0.299	0.278	3.69325e-39	0
PHF19	5.92959e-44	0.5116	0.169	0.145	3.77626e-39	0
ARFGEF1	7.52694e-44	0.46917	0.245	0.223	4.79353e-39	0
PLBD1	1.16582e-43	0.329358	0.218	0.191	7.42454e-39	0
GPR155	1.18773e-43	0.517315	0.128	0.105	7.56408e-39	0
CCDC7	1.37051e-43	0.689878	0.108	0.088	8.72808e-39	0
RAPGEF5	1.41876e-43	0.524929	0.101	0.081	9.03538e-39	0
CTSC	2.16004e-43	0.398095	0.222	0.195	1.37562e-38	0
B9D1	2.40209e-43	0.621715	0.145	0.123	1.52977e-38	0
AFF1	3.24062e-43	0.41567	0.32	0.302	2.06379e-38	0
RHOJ	3.44701e-43	0.505756	0.107	0.086	2.19523e-38	0
KLHL29	3.63208e-43	0.591765	0.132	0.11	2.31309e-38	0
BMPR2	3.96469e-43	0.330154	0.293	0.269	2.52491e-38	0
CFAP298	5.96724e-43	0.451505	0.314	0.297	3.80024e-38	0
MICU3	6.95349e-43	0.567425	0.147	0.124	4.42833e-38	0
RICTOR	9.32429e-43	0.527198	0.223	0.199	5.93817e-38	0
ANP32E	2.56792e-42	0.30917	0.438	0.432	1.63538e-37	0
CFAP97	3.69539e-42	0.313729	0.434	0.426	2.35341e-37	0
C1orf198	6.42198e-42	0.506891	0.226	0.204	4.08984e-37	0
ATP8B2	2.1972e-41	0.491461	0.202	0.178	1.39928e-36	0
CPLANE1	4.52907e-41	0.691354	0.124	0.103	2.88434e-36	0
CYP27C1	1.15087e-40	0.620631	0.124	0.103	7.32932e-36	0
TRIQK	1.52503e-40	0.497204	0.228	0.207	9.71214e-36	0
FAM172A	1.68597e-40	0.498456	0.224	0.202	1.07371e-35	0
COMMD3	2.00881e-40	0.367493	0.367	0.356	1.27931e-35	0
SSR1	2.04539e-40	0.260993	0.49	0.49	1.30261e-35	0
SPRY4	3.43863e-40	0.512598	0.116	0.095	2.18989e-35	0
INTS6L	4.92855e-40	0.638179	0.107	0.087	3.13874e-35	0
SPIN1	5.40398e-40	0.418857	0.264	0.242	3.44153e-35	0
FAM13A	5.62284e-40	0.398465	0.235	0.211	3.58091e-35	0
THRB	6.45706e-40	0.563047	0.198	0.177	4.11218e-35	0
P3H3	7.13565e-40	0.445209	0.233	0.21	4.54434e-35	0
CEP112	1.70355e-39	0.455324	0.165	0.142	1.08491e-34	0
APPL1	3.91849e-39	0.344823	0.418	0.412	2.49549e-34	0
TRAM2-AS1	6.19247e-39	0.646288	0.128	0.108	3.94367e-34	0
DCAF8	7.84395e-39	0.384488	0.21	0.186	4.99542e-34	0
ZBED5	1.14215e-38	0.53489	0.21	0.189	7.2738e-34	0
MTMR2	1.21768e-38	0.40554	0.313	0.297	7.75479e-34	0
ATM	1.26733e-38	0.401735	0.308	0.29	8.071e-34	0
YEATS2	2.036e-38	0.538014	0.106	0.086	1.29663e-33	0
ZBTB10	3.6061e-38	0.419243	0.279	0.26	2.29654e-33	0
GAB1	1.06591e-37	0.639163	0.129	0.109	6.78824e-33	0
SCRN2	1.74185e-37	0.498318	0.168	0.146	1.1093e-32	0
ITSN1	3.1767e-37	0.574608	0.186	0.165	2.02308e-32	0
C2orf74	5.35856e-37	0.438437	0.223	0.201	3.4126e-32	0
TMED7	1.24054e-36	0.309391	0.42	0.414	7.9004e-32	0
MED17	1.73845e-36	0.496005	0.109	0.09	1.10713e-31	0
LRP11	3.68772e-36	0.453545	0.154	0.133	2.34853e-31	0
DNAJC1	8.57797e-36	0.25876	0.495	0.5	5.46288e-31	0
MLH3	1.53712e-35	0.458948	0.182	0.16	9.78914e-31	0
LDLRAD4	1.7637e-35	0.268731	0.287	0.263	1.12321e-30	0
OSBPL10	2.85457e-35	0.44138	0.213	0.192	1.81794e-30	0
DENND4A	3.34339e-35	0.48122	0.191	0.17	2.12924e-30	0
SAV1	4.21662e-35	0.290338	0.446	0.443	2.68535e-30	0
MAN2B2	6.03715e-35	0.471717	0.186	0.165	3.84476e-30	0
PIN4	6.14136e-35	0.37987	0.36	0.351	3.91113e-30	0
ATP7A	7.56845e-35	0.586586	0.132	0.113	4.81997e-30	0
PTGR2	9.91208e-35	0.661049	0.101	0.083	6.31251e-30	0
AC048341.1	2.4025e-34	0.641317	0.115	0.097	1.53003e-29	0
UGCG	2.54552e-34	0.416018	0.307	0.295	1.62111e-29	0
ZNF33A	4.93954e-34	0.483763	0.219	0.2	3.14575e-29	0
BHLHE40	6.21444e-34	0.414511	0.545	0.547	3.95767e-29	0
SLC39A8	1.2025e-33	0.317404	0.319	0.303	7.65814e-29	0
C11orf54	1.80702e-33	0.540641	0.158	0.138	1.1508e-28	0
NUAK1	2.24949e-33	0.363208	0.15	0.129	1.43259e-28	0
TRIP11	2.61632e-33	0.337218	0.399	0.393	1.66621e-28	0
LINC00662	2.79392e-33	0.565679	0.186	0.167	1.77931e-28	0
MT1G	3.6011e-33	0.325865	0.492	0.462	2.29336e-28	0
SORBS1	4.3076e-33	0.57957	0.116	0.098	2.74329e-28	0
CCSER2	5.29614e-33	0.261637	0.387	0.377	3.37285e-28	0
DSG2	1.01664e-32	0.488524	0.12	0.101	6.47445e-28	0
TTC32	1.08356e-32	0.518993	0.189	0.17	6.90063e-28	0
KAT2B	1.17626e-32	0.523682	0.101	0.083	7.49104e-28	0
STX17	1.26165e-32	0.44684	0.213	0.193	8.0348e-28	0
TCAF1	2.83613e-32	0.4418	0.248	0.23	1.80619e-27	0
COL16A1	3.13615e-32	0.502614	0.241	0.222	1.99725e-27	0
BCAP29	3.32683e-32	0.28097	0.474	0.476	2.11869e-27	0
CA9	3.84381e-32	0.388903	0.176	0.155	2.44793e-27	0
TMEM220	4.66003e-32	0.493017	0.204	0.185	2.96774e-27	0
SENP7	1.23239e-31	0.450955	0.157	0.137	7.84849e-27	0
RNPC3	1.36164e-31	0.501647	0.179	0.16	8.67159e-27	0
ZDHHC2	1.91745e-31	0.474016	0.141	0.121	1.22113e-26	0
WSCD2	5.77623e-31	0.490568	0.146	0.127	3.67859e-26	0
NUFIP2	1.69875e-30	0.270892	0.535	0.548	1.08185e-25	0
ALDH18A1	2.11508e-30	0.493849	0.174	0.155	1.34699e-25	0
DPY19L3	2.71851e-30	0.504456	0.128	0.11	1.73129e-25	0
EPN2	3.2992e-30	0.38774	0.261	0.244	2.1011e-25	0
DYNC1I1	5.84838e-30	0.533241	0.137	0.119	3.72454e-25	0
PRRC1	6.28667e-30	0.406559	0.261	0.244	4.00367e-25	0
CFAP300	5.32649e-29	0.744085	0.105	0.09	3.39217e-24	0
FRA10AC1	5.53863e-29	0.380205	0.316	0.304	3.52728e-24	0
THAP5	6.5843e-29	0.387876	0.299	0.285	4.19321e-24	0
RTF1	1.13003e-28	0.269707	0.518	0.532	7.19658e-24	0
TGFBR1	1.5174e-28	0.370282	0.333	0.322	9.66357e-24	0
CD8B2	2.04072e-28	0.397691	0.136	0.117	1.29964e-23	0
ICE2	3.47243e-28	0.481262	0.197	0.179	2.21142e-23	0
ZNF160	4.0583e-28	0.518264	0.144	0.126	2.58453e-23	0
FAM8A1	4.73382e-28	0.438215	0.191	0.173	3.01473e-23	0
CRYZ	5.32074e-28	0.466114	0.14	0.122	3.38851e-23	0
METTL15	6.0081e-28	0.519609	0.173	0.155	3.82626e-23	0
LINC00623	6.20587e-28	0.433574	0.141	0.122	3.95221e-23	0
KREMEN1	1.03207e-27	0.256061	0.123	0.104	6.57273e-23	0
SLC35A3	1.37173e-27	0.492265	0.18	0.162	8.73589e-23	0
LRP12	1.80076e-27	0.364707	0.157	0.139	1.14681e-22	0
TM2D1	2.34184e-27	0.289004	0.458	0.463	1.4914e-22	0
SLC2A1	2.45054e-27	0.357921	0.306	0.294	1.56062e-22	0
EEA1	2.80915e-27	0.289548	0.359	0.348	1.78901e-22	0
SCAMP1	4.33015e-27	0.38727	0.3	0.288	2.75766e-22	0
USP8	6.93825e-27	0.337056	0.368	0.362	4.41862e-22	0
SMIM19	7.67729e-27	0.312877	0.398	0.397	4.88928e-22	0
GSTM5	9.03525e-27	0.339149	0.204	0.185	5.7541e-22	0
RIC3	1.50347e-26	0.52939	0.127	0.11	9.57486e-22	0
MAOB	2.25612e-26	0.321621	0.218	0.2	1.43681e-21	0
OLMALINC	2.26697e-26	0.315546	0.185	0.166	1.44372e-21	0
CDKL5	2.63663e-26	0.599169	0.11	0.095	1.67914e-21	0
NEO1	2.74238e-26	0.495433	0.129	0.113	1.74648e-21	0
ZNF141	1.50516e-25	0.432595	0.128	0.111	9.58563e-21	0
SLF2	1.65318e-25	0.540342	0.132	0.115	1.05282e-20	0
PIGK	2.08272e-25	0.401409	0.249	0.234	1.32638e-20	0
ETS2	2.23955e-25	0.254745	0.398	0.395	1.42626e-20	0
ZNF654	2.59778e-25	0.507895	0.171	0.155	1.6544e-20	0
ADCY2	4.62929e-25	0.393837	0.138	0.121	2.94816e-20	0
TTC28	5.10466e-25	0.478932	0.126	0.109	3.25091e-20	0
COA5	5.47656e-25	0.419334	0.266	0.253	3.48774e-20	0
JRKL	5.49067e-25	0.508626	0.136	0.12	3.49674e-20	0
ODF3B	6.1838e-25	0.463877	0.136	0.119	3.93815e-20	0
LANCL1	8.17589e-25	0.482341	0.123	0.107	5.20682e-20	0
RBM12B	1.92421e-24	0.518829	0.168	0.152	1.22543e-19	0
PHF3	2.05178e-24	0.262144	0.465	0.47	1.30668e-19	0
AGA	2.37646e-24	0.414166	0.173	0.156	1.51345e-19	0
SUMF2	3.19188e-24	0.30534	0.368	0.364	2.03275e-19	0
SENP6	6.03835e-24	0.293918	0.409	0.409	3.84552e-19	0
DTD1	6.11099e-24	0.318918	0.343	0.335	3.89178e-19	0
RTL8A	6.5715e-24	0.337591	0.314	0.303	4.18506e-19	0
LINC00476	9.28953e-24	0.569659	0.103	0.088	5.91604e-19	0
ORMDL3	9.4433e-24	0.350178	0.277	0.263	6.01397e-19	0
HOOK2	2.54062e-23	0.396066	0.227	0.211	1.618e-18	0
DYRK3	2.54669e-23	0.51167	0.16	0.145	1.62186e-18	0
DNM3OS	3.17113e-23	0.510588	0.17	0.155	2.01953e-18	0
THYN1	4.32156e-23	0.367203	0.299	0.29	2.75218e-18	0
FAM217B	5.76931e-23	0.471687	0.126	0.111	3.67419e-18	0
FAM228B	6.18301e-23	0.4159	0.209	0.193	3.93765e-18	0
MAGT1	6.24813e-23	0.281566	0.357	0.351	3.97912e-18	0
KBTBD3	6.57286e-23	0.582353	0.108	0.094	4.18592e-18	0
MRPL17	1.48327e-22	0.284285	0.429	0.43	9.44624e-18	0
UGGT2	1.61092e-22	0.353493	0.272	0.26	1.02591e-17	0
CFDP1	2.76576e-22	0.296848	0.43	0.434	1.76137e-17	0
CTSO	3.22231e-22	0.297499	0.191	0.173	2.05213e-17	0
SETD7	3.41019e-22	0.337396	0.302	0.291	2.17178e-17	0
ATXN7L3B	4.62715e-22	0.315586	0.339	0.331	2.9468e-17	0
FKBP11	7.05042e-22	0.258154	0.318	0.306	4.49006e-17	0
N4BP2	9.26338e-22	0.500445	0.126	0.111	5.89938e-17	0
ZNF521	1.11422e-21	0.458158	0.197	0.182	7.09592e-17	0
PTPN22	1.87773e-21	0.282615	0.226	0.21	1.19583e-16	0
CCDC25	2.188e-21	0.330376	0.351	0.346	1.39343e-16	0
ARMC9	2.65529e-21	0.345802	0.211	0.196	1.69102e-16	0
NSRP1	3.69279e-21	0.283118	0.455	0.46	2.35176e-16	0
GPALPP1	6.07389e-21	0.508682	0.165	0.151	3.86816e-16	0
SLC22A17	6.67465e-21	0.424708	0.238	0.224	4.25075e-16	0
LNPK	7.078e-21	0.30894	0.264	0.25	4.50763e-16	0
MYO9A	8.08801e-21	0.395513	0.254	0.242	5.15085e-16	0
OGFOD3	8.87659e-21	0.364514	0.271	0.261	5.65306e-16	0
SNHG9	9.30558e-21	0.347283	0.247	0.234	5.92626e-16	0
PUS7L	1.28321e-20	0.489102	0.18	0.166	8.17213e-16	0
FGFR3	1.30419e-20	0.422025	0.117	0.103	8.30576e-16	0
HEATR5A	1.33147e-20	0.405486	0.115	0.1	8.47945e-16	0
INO80D	1.50218e-20	0.449597	0.202	0.189	9.56661e-16	0
PSMG4	1.70478e-20	0.375811	0.279	0.27	1.08569e-15	0
SIX4	2.74913e-20	0.585873	0.125	0.111	1.75079e-15	0
RIN2	3.28323e-20	0.356039	0.24	0.224	2.09093e-15	0
FBXW11	3.94276e-20	0.277605	0.34	0.333	2.51095e-15	0
MPDZ	5.64274e-20	0.400932	0.193	0.179	3.59358e-15	0
TMA16	6.0664e-20	0.399935	0.249	0.238	3.86338e-15	0
TK2	6.94433e-20	0.432964	0.206	0.193	4.4225e-15	0
CC2D2A	9.13363e-20	0.452321	0.1	0.087	5.81675e-15	0
HOXD8	1.85264e-19	0.379983	0.213	0.199	1.17986e-14	0
FBXL17	2.07917e-19	0.440559	0.12	0.106	1.32412e-14	0
RTL8B	2.29742e-19	0.452679	0.122	0.108	1.46311e-14	0
HLTF	2.60721e-19	0.439014	0.217	0.204	1.6604e-14	0
GOLGA3	2.71145e-19	0.313714	0.322	0.314	1.72679e-14	0
TOR1AIP1	3.36639e-19	0.303137	0.378	0.377	2.14389e-14	0
PPP1R16A	4.24259e-19	0.417481	0.179	0.165	2.70189e-14	0
SLC27A5	5.25352e-19	0.520727	0.116	0.102	3.3457e-14	0
PRRX2	7.13363e-19	0.30939	0.39	0.387	4.54305e-14	0
UBN2	7.25196e-19	0.507891	0.166	0.153	4.61841e-14	0
PRR34-AS1	7.71574e-19	0.501498	0.133	0.119	4.91377e-14	0
DHX40	1.72006e-18	0.32943	0.253	0.241	1.09542e-13	0
PSTPIP1	3.06784e-18	0.276657	0.103	0.09	1.95376e-13	0
GTF2H5	3.40733e-18	0.29509	0.399	0.402	2.16996e-13	0
ZCCHC9	4.26273e-18	0.447647	0.196	0.183	2.71472e-13	0
TMCO3	6.10967e-18	0.252478	0.372	0.371	3.89094e-13	0
ABRAXAS1	2.0593e-17	0.413654	0.183	0.17	1.31147e-12	0
CMYA5	2.29561e-17	0.451859	0.125	0.112	1.46196e-12	0
CEP44	2.77349e-17	0.497198	0.138	0.125	1.7663e-12	0
TGFB3	3.60962e-17	0.30649	0.11	0.097	2.29879e-12	0
SLC35F5	4.27621e-17	0.4227	0.205	0.193	2.7233e-12	0
RAPH1	4.71319e-17	0.321119	0.321	0.316	3.0016e-12	0
CLN5	5.02113e-17	0.335026	0.292	0.285	3.19771e-12	0
DNAJC10	5.1686e-17	0.274089	0.316	0.308	3.29162e-12	0
MAPK10	5.84924e-17	0.430537	0.101	0.089	3.72509e-12	0
ADGRA3	7.51051e-17	0.536851	0.123	0.111	4.78307e-12	0
ABHD14A	8.85248e-17	0.308342	0.245	0.233	5.6377e-12	0
RMDN1	9.78336e-17	0.418525	0.192	0.18	6.23053e-12	0
ZNHIT6	1.02189e-16	0.456699	0.199	0.187	6.50791e-12	0
HPF1	1.13666e-16	0.375412	0.29	0.284	7.2388e-12	0
NIN	1.54422e-16	0.369434	0.186	0.172	9.83436e-12	0
AF117829.1	2.56104e-16	0.474736	0.126	0.114	1.631e-11	0
XRRA1	3.75999e-16	0.408154	0.165	0.152	2.39455e-11	0
CHD2	5.58232e-16	0.319194	0.381	0.383	3.5551e-11	0
ZBTB21	1.41673e-15	0.335895	0.299	0.293	9.02245e-11	0
MAGI2	1.89874e-15	0.440131	0.2	0.189	1.20921e-10	0
OBSL1	2.41181e-15	0.395085	0.188	0.176	1.53596e-10	0
DENND1B	2.73378e-15	0.433131	0.11	0.098	1.74101e-10	0
SLC2A10	5.87261e-15	0.39398	0.116	0.104	3.73997e-10	0
TDRD3	6.70187e-15	0.450585	0.151	0.139	4.26808e-10	0
PSIP1	7.40123e-15	0.251748	0.433	0.44	4.71348e-10	0
GALNT11	7.90564e-15	0.297632	0.24	0.229	5.03471e-10	0
PDS5B	9.57929e-15	0.376537	0.261	0.253	6.10057e-10	0
ITPR1	1.04326e-14	0.293372	0.111	0.099	6.64398e-10	0
ARID1B	1.07123e-14	0.264496	0.386	0.387	6.82215e-10	0
ATRN	1.51379e-14	0.38414	0.135	0.122	9.64059e-10	0
EPM2AIP1	2.84653e-14	0.341034	0.29	0.284	1.81281e-09	0
HCG18	2.92551e-14	0.418402	0.223	0.215	1.86311e-09	0
TBX15	3.68144e-14	0.334599	0.291	0.285	2.34453e-09	0
MBTPS1	3.72933e-14	0.278462	0.362	0.363	2.37502e-09	0
ZCCHC14	3.81257e-14	0.385139	0.17	0.159	2.42804e-09	0
PCM1	4.68719e-14	0.253761	0.433	0.444	2.98504e-09	0
ZFAND1	7.15945e-14	0.256421	0.34	0.336	4.5595e-09	0
NSUN6	8.82923e-14	0.423146	0.17	0.159	5.62289e-09	0
RBM43	1.00861e-13	0.254024	0.167	0.154	6.42335e-09	0
SPAG4	1.0751e-13	0.388639	0.11	0.099	6.84677e-09	0
BRD8	1.12023e-13	0.398321	0.194	0.184	7.13421e-09	0
POC1B	1.65764e-13	0.465428	0.102	0.091	1.05567e-08	0
DDX42	2.15357e-13	0.281387	0.336	0.334	1.3715e-08	0
MBD5	2.89539e-13	0.464286	0.158	0.147	1.84393e-08	0
HIPK3	3.21386e-13	0.263153	0.35	0.349	2.04675e-08	0
CCDC6	3.45026e-13	0.271596	0.306	0.3	2.1973e-08	0
HCFC2	3.76347e-13	0.401316	0.114	0.102	2.39677e-08	0
POLI	5.69589e-13	0.476131	0.109	0.099	3.62743e-08	0
LAGE3	6.78638e-13	0.289312	0.325	0.323	4.32191e-08	0
PTPDC1	7.47621e-13	0.509401	0.103	0.093	4.76122e-08	0
FGF14-AS2	1.04376e-12	0.486988	0.108	0.098	6.64719e-08	0
DPY19L1	1.05306e-12	0.386341	0.123	0.112	6.70643e-08	0
ZNF302	1.05985e-12	0.419826	0.231	0.224	6.74965e-08	0
SNTB2	1.1522e-12	0.260604	0.299	0.292	7.33778e-08	0
GALT	2.00475e-12	0.407029	0.108	0.097	1.27673e-07	0
STT3A	2.11852e-12	0.29131	0.261	0.253	1.34918e-07	0
RWDD4	2.8412e-12	0.299391	0.301	0.298	1.80942e-07	0
DICER1	4.088e-12	0.349074	0.248	0.241	2.60344e-07	0
DCHS1	4.73688e-12	0.342293	0.162	0.151	3.01668e-07	0
ZNF770	7.25342e-12	0.364673	0.245	0.24	4.61934e-07	0
CNTLN	1.00446e-11	0.347069	0.169	0.159	6.39691e-07	0
EDEM3	1.19739e-11	0.321099	0.25	0.243	7.62558e-07	0
SPATA13	1.3207e-11	0.367298	0.152	0.142	8.41086e-07	0
MINCR	1.35658e-11	0.48217	0.101	0.092	8.6394e-07	0
DTWD1	1.48853e-11	0.343287	0.314	0.313	9.47968e-07	0
DPM3	1.61013e-11	0.30842	0.33	0.331	1.02541e-06	0
SPAG16	2.32491e-11	0.352506	0.234	0.227	1.48062e-06	0
ZNF518A	2.59112e-11	0.423292	0.126	0.116	1.65015e-06	0
CDK17	2.92783e-11	0.361823	0.171	0.161	1.86459e-06	0
NUMA1	3.24069e-11	0.264108	0.32	0.317	2.06383e-06	0
C11orf71	3.61959e-11	0.423858	0.134	0.125	2.30514e-06	0
ZSWIM7	3.68345e-11	0.310334	0.267	0.262	2.3458e-06	0
KRIT1	7.6143e-11	0.365779	0.259	0.256	4.84916e-06	0
PLEKHH2	8.63793e-11	0.325163	0.227	0.219	5.50107e-06	0
SMIM27	1.17513e-10	0.469161	0.103	0.094	7.48385e-06	0
FCHSD2	1.32681e-10	0.386035	0.187	0.179	8.44976e-06	0
INPP5F	1.50329e-10	0.510183	0.11	0.101	9.57373e-06	0
EEF1AKMT2	1.71859e-10	0.409445	0.192	0.185	1.09448e-05	0
POGZ	1.81726e-10	0.341108	0.231	0.224	1.15732e-05	0
R3HDM2	2.21931e-10	0.318191	0.293	0.291	1.41337e-05	0
PATJ	2.74558e-10	0.466	0.111	0.103	1.74852e-05	0
XIST	2.84251e-10	0.713063	0.369	0.408	1.81025e-05	0
LRRCC1	2.89915e-10	0.394833	0.117	0.107	1.84632e-05	0
MAP3K12	5.0707e-10	0.36387	0.114	0.105	3.22927e-05	0
SDHAF3	5.65616e-10	0.413202	0.195	0.188	3.60212e-05	0
MIGA1	6.02086e-10	0.350803	0.207	0.199	3.83439e-05	0
REV1	7.31701e-10	0.38158	0.21	0.203	4.65983e-05	0
ST5	7.95029e-10	0.329346	0.146	0.136	5.06314e-05	0
RBFA	7.95283e-10	0.389098	0.163	0.154	5.06476e-05	0
DDHD2	8.69668e-10	0.410538	0.111	0.103	5.53848e-05	0
ANKRD35	9.45556e-10	0.326894	0.252	0.247	6.02177e-05	0
PIGBOS1	1.31339e-09	0.360418	0.217	0.211	8.36433e-05	0
CEP57	1.5987e-09	0.265204	0.294	0.29	0.000101813	0
TNRC18	1.84408e-09	0.278874	0.136	0.126	0.00011744	0
ZDHHC20	1.97092e-09	0.298631	0.184	0.175	0.000125518	0
GNL3L	2.11014e-09	0.375259	0.1	0.091	0.000134384	0
RLIM	2.20403e-09	0.364354	0.245	0.242	0.000140364	0
SMIM4	3.30899e-09	0.349771	0.249	0.245	0.000210733	0
RYK	4.32857e-09	0.261047	0.344	0.347	0.000275665	0
CBX7	5.38601e-09	0.325937	0.174	0.166	0.000343008	0
NAALADL1	6.28714e-09	0.376141	0.147	0.139	0.000400396	0
MRPS31	8.5908e-09	0.345516	0.231	0.226	0.000547105	0
RSBN1	9.24488e-09	0.267316	0.335	0.336	0.00058876	0
SYNGR1	1.61373e-08	0.256925	0.165	0.156	0.00102771	0
ZNF827	1.70061e-08	0.303724	0.102	0.094	0.00108304	0
LGR4	1.73795e-08	0.332466	0.117	0.108	0.00110681	0
CCDC66	1.93017e-08	0.377896	0.237	0.234	0.00122923	0
AC027644.3	1.96436e-08	0.323824	0.217	0.211	0.001251	0
POLR3GL	2.05898e-08	0.264222	0.337	0.34	0.00131126	0
PKN2	2.25395e-08	0.314166	0.309	0.311	0.00143543	0
SPATA6	2.26364e-08	0.4257	0.138	0.13	0.0014416	0
RBMS2	2.37467e-08	0.381141	0.132	0.123	0.00151231	0
IFT88	2.56686e-08	0.451545	0.148	0.141	0.0016347	0
MRPS17	2.64194e-08	0.33382	0.12	0.112	0.00168252	0
LINC01184	2.96143e-08	0.414671	0.149	0.142	0.00188599	0
RBL2	3.02534e-08	0.279091	0.241	0.235	0.00192669	0
PHF10	3.42657e-08	0.326924	0.273	0.273	0.00218221	0
AC009041.2	4.33744e-08	0.497815	0.108	0.101	0.0027623	0
DYRK4	5.3062e-08	0.343562	0.233	0.229	0.00337925	0
WAC-AS1	6.76149e-08	0.394621	0.18	0.173	0.00430605	0
TMEM209	6.76606e-08	0.407067	0.101	0.094	0.00430897	0
HMG20A	6.80361e-08	0.448199	0.121	0.114	0.00433288	0
ZFYVE16	7.78111e-08	0.266836	0.27	0.268	0.0049554	0
XRN1	7.79386e-08	0.261253	0.281	0.28	0.00496352	0
CRACR2B	1.2128e-07	0.391567	0.102	0.095	0.00772373	0
METTL14	2.09996e-07	0.383197	0.154	0.147	0.0133736	0
SMAD2	2.11116e-07	0.318111	0.266	0.264	0.0134449	0
RSRC1	2.12978e-07	0.291854	0.305	0.307	0.0135635	0
PUM2	2.54923e-07	0.286235	0.233	0.229	0.0162347	0
CRY1	2.61952e-07	0.342384	0.208	0.204	0.0166824	0
CEBPZOS	2.84284e-07	0.324346	0.28	0.28	0.0181046	0
ACSF2	3.25338e-07	0.371968	0.11	0.103	0.0207192	0
ERLIN2	3.27184e-07	0.329042	0.159	0.151	0.0208367	0
ADAMTSL2	4.26765e-07	0.399417	0.104	0.097	0.0271785	0
POU2F1	4.54164e-07	0.362541	0.131	0.124	0.0289234	0
CLASP2	5.21772e-07	0.404984	0.12	0.114	0.033229	0
TMEM185A	5.44159e-07	0.37648	0.102	0.095	0.0346548	0
TMEM134	6.74209e-07	0.259493	0.311	0.314	0.042937	0
MLF1	7.18222e-07	0.318399	0.253	0.252	0.04574	0
MED27	7.23606e-07	0.348738	0.174	0.168	0.0460828	0
PRKD3	1.10031e-06	0.327701	0.197	0.191	0.0700735	0
MAP3K13	1.14669e-06	0.322551	0.309	0.314	0.0730272	0
VAMP4	1.1769e-06	0.36051	0.167	0.161	0.0749509	0
FZD7	1.43871e-06	0.371298	0.153	0.147	0.091624	0
PIAS2	1.60091e-06	0.361686	0.161	0.156	0.101954	0
TCP11L2	1.60547e-06	0.303194	0.109	0.102	0.102244	0
TNFRSF10D	1.67724e-06	0.331772	0.248	0.248	0.106815	0
PTPN4	1.74456e-06	0.324212	0.111	0.104	0.111102	0
LATS1	1.87628e-06	0.328028	0.141	0.134	0.119491	0
UXS1	2.44805e-06	0.30154	0.215	0.211	0.155904	0
ERCC6L2	2.69722e-06	0.375666	0.133	0.126	0.171772	0
IMPACT	3.26805e-06	0.380118	0.166	0.161	0.208126	0
RAB3GAP2	3.76668e-06	0.323737	0.204	0.2	0.239881	0
ZNF506	4.15052e-06	0.328084	0.138	0.131	0.264326	0
PREPL	4.18257e-06	0.340243	0.244	0.244	0.266367	0
SHPRH	4.4882e-06	0.361071	0.197	0.193	0.285831	0
ADARB1	6.03846e-06	0.315631	0.13	0.124	0.384559	0
EXOC6B	9.12641e-06	0.348731	0.121	0.115	0.581215	0
HMBOX1	9.75266e-06	0.348248	0.13	0.124	0.621098	0
CAB39L	1.07223e-05	0.285123	0.219	0.215	0.682849	0
NXPH4	1.09361e-05	0.303224	0.147	0.141	0.696466	0
UMAD1	1.13248e-05	0.393331	0.145	0.14	0.721217	0
CISD1	1.37147e-05	0.271625	0.308	0.312	0.873422	0
SP4	1.38062e-05	0.417707	0.102	0.097	0.879251	0
ANGPTL4	1.47315e-05	0.843005	0.408	0.457	0.938177	0
TCEAL1	1.85011e-05	0.338214	0.171	0.167	1	0
DIS3	1.94657e-05	0.259827	0.356	0.366	1	0
RC3H1	2.00567e-05	0.326068	0.176	0.172	1	0
KANSL1-AS1	2.1052e-05	0.421258	0.111	0.105	1	0
WDR60	2.29644e-05	0.386719	0.211	0.209	1	0
EFCAB14	2.63873e-05	0.259979	0.314	0.319	1	0
HOXD9	2.66633e-05	0.251645	0.115	0.109	1	0
DYNC2H1	2.76275e-05	0.355406	0.159	0.154	1	0
TMEM168	2.79275e-05	0.395089	0.118	0.113	1	0
CSTF3	2.85396e-05	0.367325	0.126	0.121	1	0
TCEA2	3.27819e-05	0.271183	0.321	0.327	1	0
HDAC8	4.66179e-05	0.388992	0.125	0.12	1	0
CAPN7	4.68531e-05	0.356424	0.231	0.231	1	0
BBS2	4.79425e-05	0.383435	0.105	0.1	1	0
SMAD5	5.14291e-05	0.296739	0.312	0.319	1	0
CARD19	6.12656e-05	0.305114	0.303	0.309	1	0
TSPYL5	6.33721e-05	0.376904	0.124	0.119	1	0
ZFP90	6.97956e-05	0.344632	0.104	0.098	1	0
ZHX3	7.57548e-05	0.326711	0.141	0.136	1	0
CDC37L1	7.75681e-05	0.269628	0.316	0.322	1	0
TCTN1	0.000108108	0.296711	0.234	0.234	1	0
CEP290	0.000118212	0.355476	0.178	0.175	1	0
DOCK1	0.000118819	0.306012	0.168	0.164	1	0
CRY2	0.000181637	0.300882	0.122	0.117	1	0
TNRC6C	0.000197708	0.262807	0.194	0.191	1	0
ATG2B	0.00021667	0.361491	0.102	0.097	1	0
PM20D2	0.00021708	0.380659	0.13	0.126	1	0
MEG8	0.000249352	0.293359	0.133	0.144	1	0
SCAPER	0.000254652	0.327291	0.141	0.136	1	0
POLG2	0.000271422	0.32993	0.146	0.141	1	0
SORT1	0.000276595	0.256367	0.12	0.115	1	0
BLOC1S5	0.0002911	0.311756	0.148	0.144	1	0
RIOX2	0.00030016	0.260746	0.114	0.124	1	0
KIAA1109	0.000306063	0.283292	0.206	0.204	1	0
CSKMT	0.000353464	0.251573	0.159	0.171	1	0
MAT2B	0.000357418	0.267805	0.227	0.226	1	0
CWF19L2	0.00049248	0.283015	0.243	0.242	1	0
FZD9	0.000495802	0.325576	0.12	0.116	1	0
AP5M1	0.000509522	0.393299	0.116	0.112	1	0
THNSL2	0.000525299	0.264001	0.12	0.115	1	0
CEP63	0.000592665	0.287944	0.293	0.299	1	0
NT5C2	0.000629799	0.306268	0.143	0.139	1	0
UBXN7	0.000679752	0.319164	0.201	0.2	1	0
KDM4C	0.000832898	0.36548	0.103	0.099	1	0
THAP6	0.000847062	0.446092	0.142	0.139	1	0
ZNF680	0.0010842	0.450447	0.103	0.1	1	0
AGO3	0.00109591	0.309607	0.252	0.255	1	0
TENT2	0.00111163	0.397907	0.142	0.139	1	0
ADAL	0.00140513	0.3733	0.137	0.134	1	0
WRN	0.00146432	0.402432	0.114	0.111	1	0
CTDSPL2	0.00173991	0.298682	0.199	0.198	1	0
KPNA5	0.00179212	0.387681	0.133	0.13	1	0
ALDOC	0.00188221	0.273468	0.208	0.207	1	0
LDOC1	0.00191174	0.279275	0.114	0.11	1	0
MANBA	0.00199699	0.288582	0.125	0.121	1	0
ATE1	0.00223095	0.3018	0.186	0.184	1	0
IMMP1L	0.00230752	0.429929	0.143	0.141	1	0
TENT4A	0.00266073	0.255981	0.106	0.113	1	0
DLEU2	0.00280364	0.389319	0.125	0.123	1	0
C11orf1	0.00305683	0.295878	0.195	0.194	1	0
SPATS2	0.00345327	0.25687	0.249	0.252	1	0
ELMOD2	0.00346913	0.262693	0.133	0.142	1	0
SLC39A10	0.00372083	0.314987	0.161	0.159	1	0
FBXO4	0.00384936	0.36975	0.119	0.116	1	0
SLC35A1	0.00396209	0.332333	0.122	0.118	1	0
KANSL1L	0.00404745	0.303911	0.185	0.184	1	0
TUBD1	0.00418509	0.261875	0.111	0.118	1	0
TRMT1L	0.00441919	0.30066	0.1	0.096	1	0
MTX3	0.00467343	0.324127	0.105	0.102	1	0
RXYLT1	0.00500936	0.306374	0.218	0.22	1	0
VSIG10	0.00516422	0.377919	0.115	0.112	1	0
TRIM52	0.00575051	0.25527	0.122	0.13	1	0
SLC6A8	0.00584011	0.36991	0.196	0.198	1	0
MIA2	0.00605145	0.371516	0.182	0.183	1	0
U2AF1L4	0.00676243	0.390429	0.127	0.125	1	0
RGP1	0.00724096	0.417639	0.102	0.099	1	0
GPR180	0.00764571	0.256245	0.102	0.109	1	0
SLC25A13	0.00814018	0.353463	0.138	0.137	1	0
VOPP1	0.00814373	0.259231	0.275	0.281	1	0
ESF1	0.00883796	0.280785	0.309	0.318	1	0
TTC33	0.00886635	0.348515	0.119	0.116	1	0
NFXL1	0.00961291	0.379437	0.103	0.101	1	0
APTR	0.00992395	0.25026	0.105	0.111	1	0
CTGF	0	2.63224	0.948	0.279	0	1
WISP3	0	3.97744	0.712	0.064	0	1
C2orf40	0	3.42224	0.999	0.381	0	1
CYR61	0	2.13384	0.882	0.277	0	1
AL078639.1	0	1.69594	0.852	0.259	0	1
CYTL1	0	1.80797	0.945	0.356	0	1
C9orf3	0	1.84076	0.842	0.274	0	1
S100B	0	1.73592	0.938	0.391	0	1
2024-09-07	0	0.952554	0.882	0.349	0	1
COL9A3	0	1.94116	0.963	0.434	0	1
SNORC	0	1.26855	0.95	0.425	0	1
COL11A2	0	1.43894	0.848	0.329	0	1
SPINT2	0	1.52961	0.941	0.425	0	1
GDF10	0	1.74418	0.724	0.215	0	1
C6orf48	0	1.25215	0.748	0.24	0	1
COL9A2	0	1.4931	0.765	0.281	0	1
PLA2G16	0	1.98379	0.59	0.132	0	1
BARX1	0	1.43699	0.789	0.332	0	1
TCEAL2	0	1.10744	0.85	0.393	0	1
FKBP2	0	1.00008	0.834	0.378	0	1
FRZB	0	1.40858	0.907	0.452	0	1
FAM96B	0	0.790742	0.757	0.305	0	1
NR4A2	0	1.8894	0.877	0.427	0	1
CPE	0	1.24169	0.763	0.319	0	1
COL2A1	0	1.44572	0.883	0.44	0	1
C8orf59	0	0.92288	0.715	0.272	0	1
CILP2	0	1.8241	0.846	0.407	0	1
HAPLN1	0	1.23268	0.972	0.533	0	1
PTP4A1	0	1.3391	0.637	0.199	0	1
C19orf70	0	1.11007	0.669	0.232	0	1
FBXO2	0	1.22281	0.925	0.493	0	1
COL11A1	0	1.13663	0.808	0.377	0	1
TUBB2B	0	2.0699	0.638	0.209	0	1
SERPINA5	0	1.77357	0.748	0.322	0	1
S100A1	0	0.544679	0.895	0.471	0	1
ATP1B1	0	1.11088	0.804	0.384	0	1
WWP2	0	0.975304	0.825	0.408	0	1
PRKCZ	0	1.5861	0.606	0.194	0	1
ITM2A	0	1.33702	0.82	0.411	0	1
TRPV4	0	1.47811	0.627	0.222	0	1
ACAN	0	1.25681	0.981	0.579	0	1
MELTF	0	1.08638	0.709	0.31	0	1
GPC6	0	0.818891	0.764	0.368	0	1
ITGA10	0	0.834542	0.85	0.458	0	1
FOXC2	0	1.48002	0.717	0.325	0	1
GPRC5C	0	1.21683	0.646	0.255	0	1
GSTT2B	0	1.63148	0.585	0.196	0	1
CLEC3A	0	1.80908	0.685	0.299	0	1
TIPARP	0	1.17344	0.803	0.42	0	1
DUSP14	0	1.64644	0.681	0.299	0	1
NRN1	0	0.994665	0.85	0.472	0	1
LAG3	0	0.964212	0.725	0.351	0	1
FIBIN	0	0.910629	0.762	0.392	0	1
GEM	0	1.55906	0.842	0.473	0	1
CHAD	0	0.422025	0.797	0.429	0	1
STC2	0	1.33939	0.614	0.246	0	1
FXYD6	0	1.0068	0.79	0.423	0	1
GALNT18	0	1.23105	0.595	0.228	0	1
TSPAN6	0	1.01325	0.683	0.317	0	1
NDRG2	0	1.11091	0.664	0.3	0	1
CTHRC1	0	1.57386	0.606	0.242	0	1
MIR22HG	0	0.901182	0.758	0.395	0	1
MUC20-OT1	0	2.10644	0.459	0.097	0	1
SEMA3E	0	1.10719	0.668	0.307	0	1
NR4A1	0	0.94431	0.738	0.377	0	1
NLRP1	0	1.9982	0.483	0.123	0	1
2024-09-02	0	0.701726	0.59	0.232	0	1
SERPINA1	0	0.820521	0.989	0.631	0	1
PPP1R3C	0	0.953153	0.748	0.393	0	1
SOX9	0	1.05985	0.869	0.514	0	1
TROVE2	0	1.11698	0.529	0.175	0	1
TUBB2A	0	1.1327	0.796	0.442	0	1
MDFI	0	1.63007	0.544	0.19	0	1
FGFR2	0	1.27428	0.516	0.166	0	1
GPRC5A	0	0.933196	0.74	0.39	0	1
FGFRL1	0	0.941963	0.698	0.349	0	1
MINOS1	0	0.562055	0.585	0.239	0	1
AES	0	0.518953	0.576	0.23	0	1
SMOC2	0	1.41382	0.785	0.442	0	1
APOD	0	0.980312	0.762	0.42	0	1
CDC42EP5	0	0.842201	0.771	0.429	0	1
RHOBTB3	0	0.905014	0.823	0.481	0	1
SDC2	0	1.10631	0.944	0.603	0	1
TSC22D2	0	0.981233	0.642	0.302	0	1
BAMBI	0	1.34605	0.565	0.225	0	1
CCNB1IP1	0	1.00328	0.698	0.358	0	1
NEBL	0	0.563412	0.663	0.324	0	1
BEX4	0	0.833765	0.7	0.361	0	1
ENHO	0	2.23819	0.442	0.105	0	1
GTF2B	0	1.04204	0.743	0.407	0	1
PIM3	0	1.19297	0.779	0.443	0	1
KRT8	0	1.45218	0.502	0.166	0	1
FAM162A	0	1.04771	0.919	0.585	0	1
SERTAD1	0	1.11791	0.858	0.525	0	1
DLX5	0	1.22698	0.544	0.213	0	1
TIMP4	0	1.16348	0.698	0.368	0	1
EIF3L	0	0.908117	0.858	0.528	0	1
JMJD6	0	0.957233	0.653	0.325	0	1
CDKN1A	0	0.574414	0.878	0.55	0	1
SERTAD4-AS1	0	0.809128	0.64	0.313	0	1
BNIP3	0	1.04358	0.902	0.577	0	1
C1orf123	0	1.13391	0.478	0.153	0	1
DNAJB9	0	1.08462	0.817	0.492	0	1
THUMPD3-AS1	0	0.681104	0.779	0.455	0	1
SNAPC1	0	0.912745	0.735	0.411	0	1
PELI1	0	1.07384	0.565	0.241	0	1
GREM1	0	1.89808	0.442	0.119	0	1
ANGPTL2	0	0.881509	0.857	0.534	0	1
SSPN	0	0.533197	0.781	0.459	0	1
ADSSL1	0	1.16744	0.525	0.203	0	1
METRN	0	1.18453	0.625	0.303	0	1
INHBA	0	0.407965	0.794	0.473	0	1
NFATC1	0	1.23411	0.535	0.214	0	1
UBE2S	0	0.933376	0.809	0.489	0	1
CHD1	0	0.941058	0.715	0.396	0	1
AC009414.2	0	4.11202	0.336	0.018	0	1
ITM2C	0	1.09306	0.875	0.558	0	1
STK26	0	0.86978	0.6	0.284	0	1
ZNF385D	0	0.676183	0.756	0.443	0	1
IER5	0	0.593244	0.815	0.502	0	1
CTSF	0	0.682022	0.771	0.459	0	1
FOXA3	0	2.29489	0.419	0.107	0	1
TCEAL6	0	1.20394	0.476	0.166	0	1
BEX3	0	0.689623	0.841	0.532	0	1
TCEA3	0	0.809641	0.576	0.269	0	1
CDKN1C	0	0.826815	0.712	0.405	0	1
TGIF1	0	1.04127	0.707	0.4	0	1
SLC25A36	0	0.723712	0.765	0.459	0	1
MAP2K6	0	1.05684	0.485	0.179	0	1
PAPSS2	0	0.549249	0.781	0.476	0	1
ERRFI1	0	1.18535	0.895	0.591	0	1
LIMCH1	0	0.60471	0.652	0.348	0	1
FAM20C	0	0.677238	0.664	0.36	0	1
CILP	0	0.943907	0.932	0.629	0	1
2024-09-10	0	1.02818	0.46	0.158	0	1
MAFF	0	0.711169	0.725	0.423	0	1
FXYD1	0	0.655176	0.812	0.511	0	1
SAP30	0	0.591515	0.718	0.417	0	1
SCRG1	0	1.07035	0.989	0.689	0	1
EFEMP2	0	0.585834	0.698	0.398	0	1
TUBA1C	0	0.621188	0.817	0.517	0	1
EPB41L4A-AS1	0	0.632509	0.869	0.57	0	1
NME4	0	0.733105	0.653	0.354	0	1
VEGFA	0	0.442674	0.843	0.544	0	1
CDA	0	0.670109	0.56	0.262	0	1
CHADL	0	1.46081	0.414	0.116	0	1
BAG3	0	0.533519	0.688	0.39	0	1
EIF4A3	0	1.00778	0.757	0.46	0	1
COPZ2	0	0.643768	0.804	0.508	0	1
IDI1	0	0.719319	0.731	0.435	0	1
RGS16	0	0.26661	0.787	0.492	0	1
CHID1	0	0.708134	0.687	0.392	0	1
MYL6B	0	0.68721	0.669	0.374	0	1
TPD52L1	0	0.617168	0.74	0.445	0	1
LMO4	0	1.08233	0.833	0.539	0	1
PGM1	0	0.70534	0.641	0.348	0	1
RARRES2	0	1.16835	0.515	0.223	0	1
ANGPTL4	0	1.14243	0.717	0.425	0	1
LSP1	0	0.493961	0.706	0.415	0	1
ORMDL3	0	0.923754	0.527	0.237	0	1
SCIN	0	0.641218	0.575	0.285	0	1
C11orf96	0	1.38967	0.844	0.554	0	1
WRB	0	1.72719	0.377	0.088	0	1
FOXD1	0	1.01882	0.501	0.213	0	1
GAS6	0	0.293834	0.733	0.445	0	1
ANKRD37	0	0.51183	0.634	0.347	0	1
FOXC1	0	0.784495	0.869	0.582	0	1
RYBP	0	0.631586	0.626	0.339	0	1
NFIL3	0	0.744819	0.704	0.417	0	1
TMEM45A	0	0.444029	0.705	0.419	0	1
APOPT1	0	1.25265	0.416	0.13	0	1
IVNS1ABP	0	0.480442	0.805	0.52	0	1
CDO1	0	0.476196	0.927	0.642	0	1
PCF11	0	0.577692	0.677	0.392	0	1
KDELC2	0	1.48868	0.376	0.091	0	1
LDLRAD4	0	1.16913	0.524	0.239	0	1
ERF	0	0.94922	0.513	0.228	0	1
NINJ1	0	0.465291	0.728	0.443	0	1
PHLDA1	0	1.31705	0.747	0.462	0	1
NPDC1	0	0.505948	0.622	0.338	0	1
CKB	0	0.650742	0.572	0.288	0	1
SPSB1	0	0.973208	0.517	0.234	0	1
EDIL3	0	0.267373	0.852	0.569	0	1
2024-09-06	0	1.19809	0.384	0.101	0	1
SLC16A3	0	0.574959	0.602	0.319	0	1
RSRP1	0	0.641708	0.904	0.622	0	1
MAGED2	0	0.7652	0.87	0.588	0	1
RBBP6	0	0.609284	0.78	0.498	0	1
CCNH	0	0.865367	0.572	0.29	0	1
PRKCA	0	0.714785	0.581	0.299	0	1
KDELR3	0	0.719341	0.579	0.297	0	1
PNKD	0	0.545492	0.688	0.406	0	1
CRISPLD1	0	1.01946	0.488	0.207	0	1
SCX	0	0.976507	0.527	0.246	0	1
COL27A1	0	0.641493	0.533	0.252	0	1
NOL3	0	0.835001	0.532	0.251	0	1
MRPS6	0	0.428716	0.796	0.515	0	1
CD8B2	0	1.83051	0.372	0.093	0	1
PCSK1N	0	1.93025	0.452	0.173	0	1
EGLN3	0	0.624135	0.543	0.264	0	1
LITAF	0	0.555943	0.846	0.567	0	1
KCNQ1OT1	0	0.541356	0.732	0.453	0	1
BOC	0	0.746992	0.53	0.252	0	1
DCXR	0	0.670345	0.68	0.402	0	1
DMKN	0	0.733814	0.521	0.243	0	1
SSTR2	0	1.21722	0.417	0.139	0	1
ANKH	0	0.571604	0.867	0.59	0	1
TUBB4B	0	0.998968	0.932	0.655	0	1
ERCC1	0	0.576129	0.695	0.418	0	1
JMJD1C	0	0.789749	0.822	0.545	0	1
P4HA2	0	0.715516	0.62	0.344	0	1
KLF4	0	0.720043	0.901	0.625	0	1
HBEGF	0	0.746614	0.584	0.308	0	1
SRPX2	0	0.782762	0.604	0.328	0	1
SLC6A8	0	1.17012	0.447	0.172	0	1
FOXO1	0	0.46021	0.64	0.365	0	1
ZFAND1	0	0.689181	0.586	0.311	0	1
SOWAHC	0	1.28704	0.455	0.181	0	1
FGFBP2	0	1.37672	0.926	0.652	0	1
BEX2	0	1.26122	0.427	0.153	0	1
C1QTNF4	0	1.02361	0.441	0.167	0	1
PLXDC2	0	0.336089	0.855	0.581	0	1
TMEM204	0	1.12117	0.51	0.236	0	1
PELO	0	0.783205	0.58	0.307	0	1
NGEF	0	1.09529	0.465	0.193	0	1
TENT5A	0	1.06137	0.82	0.548	0	1
STK38L	0	1.18916	0.652	0.381	0	1
OSBPL1A	0	0.701928	0.523	0.252	0	1
TGFBR3L	0	1.19819	0.42	0.149	0	1
AC068888.1	0	0.596684	0.571	0.3	0	1
FBXO30	0	1.16722	0.445	0.175	0	1
CRISPLD2	0	0.461259	0.545	0.275	0	1
REX1BD	0	0.509884	0.75	0.48	0	1
DDT	0	0.562682	0.807	0.537	0	1
TSPAN2	0	0.795406	0.575	0.305	0	1
FGF2	0	0.556837	0.806	0.537	0	1
GMDS	0	0.501463	0.625	0.357	0	1
IFRD1	0	0.687481	0.766	0.498	0	1
CHCHD10	0	0.403001	0.625	0.357	0	1
TMEM134	0	0.702897	0.555	0.288	0	1
UAP1	0	0.377327	0.842	0.575	0	1
RCN2	0	0.474736	0.812	0.545	0	1
DNAJB4	0	0.480752	0.595	0.328	0	1
QSOX1	0	0.810293	0.647	0.381	0	1
ENPP1	0	0.315926	0.764	0.498	0	1
ETFB	0	0.500094	0.764	0.498	0	1
NRBF2	0	0.806212	0.601	0.335	0	1
SNRPN	0	0.442027	0.718	0.452	0	1
SAV1	0	0.571854	0.684	0.419	0	1
TCEAL3	0	0.46139	0.745	0.48	0	1
GLIS3	0	0.886538	0.524	0.259	0	1
EPS8L2	0	0.809925	0.496	0.231	0	1
2024-09-01	0	1.3733	0.354	0.089	0	1
LAGE3	0	0.70389	0.562	0.298	0	1
DDR2	0	0.332321	0.838	0.574	0	1
OGFOD3	0	0.841677	0.501	0.237	0	1
SKIL	0	0.929549	0.775	0.512	0	1
KIAA0040	0	0.47065	0.677	0.415	0	1
SAMD4A	0	0.618714	0.551	0.289	0	1
C16orf72	0	0.705914	0.546	0.284	0	1
MATN3	0	1.12229	0.432	0.17	0	1
ID4	0	0.297041	0.659	0.397	0	1
NUCB2	0	0.624681	0.909	0.647	0	1
P3H3	0	0.946693	0.45	0.188	0	1
PQLC1	0	1.22873	0.37	0.108	0	1
FOSB	0	0.402103	0.824	0.562	0	1
TOB2	0	0.667141	0.546	0.285	0	1
OMD	0	0.694313	0.624	0.363	0	1
SOX8	0	1.73243	0.36	0.099	0	1
CD14	0	0.423271	0.541	0.281	0	1
TNS3	0	0.60651	0.522	0.262	0	1
CTBS	0	0.456533	0.695	0.435	0	1
FKBP7	0	0.4935	0.592	0.332	0	1
GUSB	0	0.595918	0.586	0.326	0	1
GBE1	0	0.646519	0.625	0.366	0	1
ADM	0	0.268548	0.702	0.443	0	1
CPAMD8	0	1.14846	0.431	0.173	0	1
SULF2	0	0.425318	0.632	0.375	0	1
LDLR	0	1.1833	0.423	0.166	0	1
CSRNP1	0	0.501842	0.595	0.338	0	1
UBE2E3	0	0.431997	0.655	0.399	0	1
LDHB	0	0.480823	0.829	0.573	0	1
BTG3	0	0.508328	0.755	0.499	0	1
MRPL40	0	0.461327	0.708	0.452	0	1
OS9	0	0.548467	0.842	0.587	0	1
MLF1	0	0.82673	0.482	0.228	0	1
GPX3	0	0.765969	0.963	0.709	0	1
SYNM	0	0.954526	0.471	0.217	0	1
PRNP	0	0.533956	0.774	0.52	0	1
OSER1	0	0.55624	0.611	0.357	0	1
CNN3	0	0.45762	0.816	0.562	0	1
PDCD4	0	0.277	0.68	0.427	0	1
PAM	0	0.322592	0.767	0.514	0	1
FSCN1	0	0.548988	0.509	0.256	0	1
BEX5	0	1.13504	0.402	0.149	0	1
SNHG7	0	0.263964	0.755	0.502	0	1
CDC37L1	0	0.872781	0.55	0.298	0	1
VWA1	0	0.599443	0.512	0.26	0	1
PTH1R	0	1.5059	0.367	0.115	0	1
GSTA4	0	0.67003	0.5	0.248	0	1
DPP7	0	0.539269	0.857	0.605	0	1
NFAT5	0	0.500155	0.619	0.367	0	1
KPNA2	0	0.874443	0.466	0.214	0	1
ALKBH7	0	0.439198	0.767	0.515	0	1
TTC3	0	0.447335	0.841	0.589	0	1
CYHR1	0	0.634903	0.516	0.265	0	1
NFATC2	0	0.981709	0.432	0.181	0	1
ING1	0	0.504452	0.587	0.336	0	1
RBP4	0	0.579053	0.697	0.447	0	1
PGAM1	0	0.378715	0.9	0.651	0	1
TMEM98	0	0.469465	0.605	0.356	0	1
PKIG	0	0.551464	0.646	0.397	0	1
PODNL1	0	0.781166	0.452	0.203	0	1
PFKP	0	0.333595	0.676	0.428	0	1
TCEA2	0	0.540007	0.551	0.303	0	1
PDE4DIP	0	0.343629	0.729	0.481	0	1
VGLL4	0	0.451013	0.768	0.52	0	1
FGFR1	0	0.497115	0.837	0.589	0	1
TSC22D1	0	1.51438	0.952	0.704	0	1
TMED3	0	0.464474	0.611	0.363	0	1
TUSC3	0	0.633159	0.472	0.224	0	1
DHRS3	0	0.569316	0.591	0.343	0	1
BHLHE41	0	0.49052	0.655	0.408	0	1
STARD10	0	0.782878	0.464	0.217	0	1
CHST3	0	0.785337	0.488	0.241	0	1
MLF2	0	0.437096	0.785	0.538	0	1
SPTSSA	0	0.476418	0.656	0.41	0	1
TFG	0	0.436398	0.752	0.506	0	1
ADRB2	0	0.953483	0.447	0.201	0	1
CNMD	0	1.35543	0.431	0.185	0	1
PRDX2	0	0.650672	0.92	0.674	0	1
GSTM5	0	0.893449	0.409	0.163	0	1
C1orf122	0	0.555609	0.732	0.487	0	1
ELL2	0	0.517218	0.732	0.487	0	1
KLF5	0	0.950536	0.43	0.185	0	1
BAZ1A	0	0.408956	0.564	0.319	0	1
FKBP10	0	0.308325	0.709	0.464	0	1
PRDX4	0	0.753054	0.934	0.69	0	1
SBSPON	0	1.19214	0.405	0.161	0	1
CNTFR	0	1.53169	0.335	0.091	0	1
ATP5PO	0	0.358741	0.843	0.599	0	1
AL118516.1	0	0.452105	0.563	0.319	0	1
IQSEC1	0	0.505169	0.53	0.287	0	1
MSRB2	0	0.447205	0.608	0.365	0	1
ZFYVE21	0	0.626406	0.591	0.348	0	1
BCAS2	0	0.518719	0.664	0.422	0	1
NR4A3	0	1.03817	0.398	0.156	0	1
HAX1	0	0.38207	0.76	0.518	0	1
MPP6	0	0.620502	0.493	0.251	0	1
CHPT1	0	0.468798	0.601	0.359	0	1
MZT2A	0	0.342334	0.668	0.427	0	1
SLC39A8	0	0.459631	0.523	0.282	0	1
PLA2G2A	0	0.427942	0.965	0.724	0	1
FGFR3	0	1.68054	0.323	0.082	0	1
TIAM2	0	0.773386	0.504	0.263	0	1
TMED4	0	0.344577	0.735	0.494	0	1
SPTY2D1	0	0.510626	0.609	0.368	0	1
SHMT2	0	0.505229	0.6	0.359	0	1
TOB1	0	0.385848	0.688	0.447	0	1
CAMSAP2	0	0.471475	0.562	0.322	0	1
FOXO3	0	0.324676	0.66	0.42	0	1
ALDH2	0	0.291574	0.56	0.32	0	1
YIPF2	0	0.556184	0.55	0.31	0	1
ATP5IF1	0	0.303666	0.846	0.606	0	1
SLC22A17	0	0.754103	0.443	0.203	0	1
LINC02001	0	1.64149	0.314	0.074	0	1
PMEPA1	0	0.609493	0.902	0.662	0	1
SIAH2	0	0.840864	0.443	0.204	0	1
SERPINI1	0	0.73639	0.457	0.218	0	1
XIST	0	0.396974	0.621	0.382	0	1
ALDOC	0	0.873491	0.424	0.185	0	1
HBP1	0	0.420936	0.654	0.416	0	1
ANG	0	0.391964	0.556	0.318	0	1
ING2	0	1.02108	0.464	0.226	0	1
FMOD	0	0.980782	0.994	0.756	0	1
SUSD5	0	0.550386	0.483	0.245	0	1
FZD9	0	1.57714	0.331	0.094	0	1
C1orf52	0	0.573422	0.515	0.278	0	1
CAMLG	0	0.399286	0.842	0.605	0	1
SIVA1	0	0.603127	0.906	0.669	0	1
IFT20	0	0.473631	0.589	0.352	0	1
HHIPL2	0	1.04146	0.377	0.141	0	1
NUFIP2	0	0.363869	0.76	0.524	0	1
EMILIN3	0	1.65066	0.317	0.081	0	1
COBLL1	0	0.465317	0.55	0.315	0	1
METTL5	0	0.352538	0.668	0.433	0	1
CHPF	0	0.448725	0.551	0.316	0	1
STRAP	0	0.346048	0.726	0.491	0	1
C1QTNF8	0	2.14571	0.299	0.064	0	1
RAB34	0	0.327437	0.813	0.578	0	1
ATP5F1A	0	0.308085	0.678	0.444	0	1
ITIH6	0	0.860048	0.381	0.147	0	1
MIR210HG	0	0.686325	0.446	0.212	0	1
LDLRAD3	0	0.989521	0.381	0.147	0	1
AC084033.3	0	1.30606	0.328	0.094	0	1
C21orf2	0	1.38834	0.32	0.086	0	1
MPC2	0	0.346053	0.755	0.521	0	1
ARMC9	0	0.856565	0.409	0.175	0	1
BDH2	0	0.29974	0.639	0.405	0	1
CDK2AP2	0	0.546162	0.583	0.349	0	1
ARIH1	0	0.430605	0.584	0.35	0	1
ARL4D	0	0.883012	0.48	0.246	0	1
ITPR2	0	0.332008	0.573	0.339	0	1
TP53I13	0	0.412271	0.571	0.337	0	1
CCDC85B	0	0.455788	0.799	0.566	0	1
DSP	0	1.15699	0.374	0.141	0	1
AK4	0	0.41437	0.508	0.275	0	1
HDLBP	0	0.484267	0.884	0.651	0	1
EGR1	0	0.516438	0.899	0.666	0	1
FAM208B	0	0.97994	0.349	0.116	0	1
HERPUD1	0	1.02093	0.965	0.732	0	1
SLC14A1	0	1.16287	0.349	0.116	0	1
HMGN3	0	0.2953	0.675	0.443	0	1
SPATS2	0	0.719537	0.462	0.23	0	1
XBP1	0	0.705414	0.922	0.691	0	1
PIGP	0	0.340675	0.653	0.422	0	1
ADGRG6	0	0.793623	0.373	0.142	0	1
IL17D	0	1.00231	0.385	0.154	0	1
ERG	0	0.601339	0.448	0.217	0	1
PXDC1	0	0.478679	0.585	0.354	0	1
FAM229B	0	0.621952	0.475	0.244	0	1
TSPAN13	0	1.20036	0.337	0.107	0	1
FAM43A	0	1.20231	0.437	0.207	0	1
TERF2IP	0	0.387924	0.812	0.583	0	1
MAPKAPK2	0	0.326755	0.532	0.303	0	1
TXNDC15	0	0.34958	0.658	0.429	0	1
CPEB4	0	0.417449	0.558	0.329	0	1
ZBTB20	0	0.46243	0.837	0.608	0	1
NDNF	0	0.77418	0.407	0.178	0	1
GPSM1	0	1.23975	0.356	0.127	0	1
GLT8D2	0	0.480153	0.502	0.273	0	1
YPEL2	0	0.508025	0.5	0.271	0	1
NXT1	0	0.425691	0.598	0.369	0	1
ATP6AP1	0	0.407459	0.563	0.334	0	1
CCPG1	0	0.426436	0.923	0.695	0	1
PER2	0	0.694377	0.445	0.217	0	1
AVPI1	0	0.969669	0.432	0.204	0	1
PPP2R2A	0	0.385663	0.578	0.35	0	1
RARG	0	0.582443	0.483	0.255	0	1
CRY1	0	0.810581	0.411	0.183	0	1
GABPB1-AS1	0	0.508751	0.506	0.278	0	1
TXNL1	0	0.31401	0.72	0.492	0	1
FBLN7	0	0.984385	0.38	0.153	0	1
ARID4B	0	0.352968	0.723	0.496	0	1
PLEKHA3	0	0.389881	0.62	0.393	0	1
ILF2	0	0.306275	0.686	0.46	0	1
MRPL55	0	0.421984	0.56	0.334	0	1
MAGEH1	0	0.486272	0.51	0.284	0	1
DBP	0	0.803842	0.403	0.177	0	1
PHGDH	0	0.556163	0.445	0.219	0	1
ODC1	0	0.26763	0.616	0.39	0	1
CUTA	0	0.349119	0.781	0.555	0	1
CLNS1A	0	0.417256	0.586	0.36	0	1
DNAJC1	0	0.322666	0.704	0.478	0	1
PINK1	0	0.429043	0.536	0.311	0	1
COL16A1	0	0.572432	0.428	0.203	0	1
CFH	0	0.667054	0.95	0.725	0	1
GLS	0	0.350302	0.778	0.553	0	1
PITX1	0	0.669861	0.47	0.245	0	1
LAYN	0	0.818277	0.411	0.186	0	1
SMOC1	0	0.260513	0.504	0.279	0	1
TSPYL2	0	0.317378	0.643	0.419	0	1
DUSP2	0	0.269634	0.368	0.144	0	1
PITHD1	0	0.40639	0.621	0.397	0	1
UGP2	0	0.454019	0.893	0.669	0	1
FAM53C	0	0.934895	0.418	0.194	0	1
EBPL	0	0.373939	0.61	0.386	0	1
HIF1A	0	0.263512	0.854	0.63	0	1
RCAN1	0	0.907133	0.717	0.493	0	1
KLHL21	0	0.721894	0.465	0.242	0	1
POLR2H	0	0.280136	0.632	0.409	0	1
ERGIC3	0	0.342478	0.655	0.432	0	1
GPM6B	0	1.26784	0.381	0.158	0	1
NDN	0	0.251271	0.584	0.361	0	1
RASD1	0	0.982897	0.625	0.402	0	1
TNNT3	0	1.66803	0.333	0.111	0	1
C11orf1	0	0.814809	0.395	0.173	0	1
HK1	0	0.398762	0.522	0.3	0	1
CDR2	0	0.626983	0.459	0.237	0	1
RAB30-AS1	0	1.17489	0.322	0.1	0	1
PCOLCE2	0	1.02041	0.987	0.766	0	1
PYURF	0	0.25422	0.694	0.473	0	1
RPN2	0	0.358049	0.785	0.565	0	1
AKR1A1	0	0.261282	0.672	0.452	0	1
PAPSS1	0	0.428388	0.514	0.294	0	1
TMEM106C	0	0.602547	0.462	0.242	0	1
SLC25A33	0	0.712276	0.428	0.208	0	1
TSC22D3	0	0.287465	0.83	0.61	0	1
NANS	0	0.367359	0.602	0.382	0	1
PNP	0	0.274431	0.576	0.356	0	1
WSB1	0	0.636492	0.853	0.633	0	1
PSMB5	0	0.250518	0.802	0.583	0	1
BAALC	0	1.29567	0.325	0.106	0	1
CHAC1	0	1.4689	0.327	0.108	0	1
CSPG4	0	0.363713	0.524	0.305	0	1
PPA1	0	0.310015	0.816	0.597	0	1
NDUFA4L2	0	0.789623	0.997	0.778	0	1
SLC7A5	0	0.382958	0.469	0.25	0	1
UFC1	0	0.284463	0.799	0.581	0	1
LGALSL	0	0.709756	0.457	0.239	0	1
BCKDHB	0	0.949152	0.367	0.149	0	1
IMPDH2	0	0.276263	0.607	0.389	0	1
IRS2	0	0.515374	0.477	0.259	0	1
TMEM219	0	0.294719	0.758	0.54	0	1
NOP53	0	0.402869	0.927	0.71	0	1
ZNF622	0	0.494205	0.513	0.296	0	1
KRT18	0	1.51833	0.341	0.124	0	1
SNAI1	0	0.434936	0.532	0.315	0	1
SDC1	0	1.42657	0.31	0.093	0	1
CHRDL2	0	1.14168	0.317	0.1	0	1
BTBD6	0	0.61755	0.431	0.214	0	1
ATRAID	0	0.431575	0.885	0.668	0	1
ERLEC1	0	0.252472	0.754	0.537	0	1
C5orf15	0	0.370279	0.577	0.36	0	1
ZDHHC4	0	0.709295	0.416	0.199	0	1
EMP2	0	0.340284	0.875	0.658	0	1
VKORC1	0	0.603329	0.94	0.723	0	1
FBXO17	0	0.69176	0.418	0.201	0	1
MYLIP	0	0.341424	0.532	0.316	0	1
NFKBIL1	0	0.695695	0.456	0.24	0	1
PACSIN3	0	1.386	0.311	0.095	0	1
SERTAD3	0	0.660834	0.428	0.212	0	1
PPP4R2	0	0.395621	0.569	0.353	0	1
NUDT4	0	0.31103	0.57	0.354	0	1
ERP29	0	0.328339	0.824	0.608	0	1
HEXA	0	0.252759	0.618	0.402	0	1
SNHG8	0	0.426483	0.923	0.708	0	1
EGLN1	0	0.341933	0.528	0.313	0	1
EIF1B	0	0.630909	0.873	0.658	0	1
RWDD4	0	0.52767	0.493	0.278	0	1
HEXB	0	0.26099	0.576	0.362	0	1
PLPP5	0	0.29351	0.61	0.396	0	1
TOP1	0	0.280983	0.73	0.516	0	1
GSTM3	0	0.250114	0.666	0.453	0	1
SLC1A4	0	0.566545	0.449	0.236	0	1
KIF13B	0	0.588866	0.438	0.225	0	1
ETF1	0	0.260074	0.61	0.397	0	1
TFDP2	0	0.346238	0.507	0.295	0	1
FAM200B	0	0.343196	0.554	0.342	0	1
SURF1	0	0.34417	0.535	0.323	0	1
C3orf58	0	1.15851	0.298	0.086	0	1
MAP1LC3B	0	0.556905	0.92	0.709	0	1
COLGALT2	0	0.253316	0.546	0.335	0	1
TMEM237	0	0.512099	0.446	0.235	0	1
LRRFIP2	0	0.255189	0.616	0.405	0	1
AP3S1	0	0.339868	0.751	0.54	0	1
BNIP3L	0	0.348542	0.854	0.643	0	1
ABCA5	0	0.309098	0.492	0.281	0	1
MAP2K3	0	0.302811	0.536	0.326	0	1
SMIM37	0	0.498921	0.359	0.149	0	1
PPP1R16A	0	0.971546	0.356	0.147	0	1
SLC20A1	0	0.387117	0.611	0.402	0	1
ASS1	0	0.266626	0.597	0.388	0	1
RGCC	0	0.46462	0.939	0.73	0	1
SLC16A10	0	0.982384	0.328	0.12	0	1
CYB5D2	0	0.609775	0.397	0.189	0	1
RFNG	0	0.417708	0.509	0.301	0	1
RAMP1	0	0.872727	0.356	0.148	0	1
LRPAP1	0	0.284138	0.828	0.62	0	1
CREB3	0	0.296596	0.541	0.334	0	1
MAPRE2	0	0.3197	0.506	0.299	0	1
GALE	0	0.687684	0.418	0.211	0	1
P4HB	0	0.721305	0.948	0.741	0	1
WDR61	0	0.310538	0.533	0.327	0	1
SGK3	0	0.507517	0.437	0.231	0	1
TMEM243	0	0.315747	0.57	0.364	0	1
FAM210A	0	0.666396	0.408	0.202	0	1
ARL6IP4	0	0.370201	0.895	0.69	0	1
DIS3	0	0.38704	0.55	0.345	0	1
DLG1	0	0.628258	0.465	0.26	0	1
TPD52	0	0.663621	0.381	0.176	0	1
NDUFV1	0	0.2583	0.521	0.316	0	1
CD320	0	0.291678	0.522	0.317	0	1
MCL1	0	0.260884	0.85	0.645	0	1
ECHDC2	0	0.551159	0.397	0.193	0	1
EFNA1	0	1.19707	0.342	0.138	0	1
DDIT4L	0	0.481413	0.455	0.251	0	1
ADGRG2	0	0.614359	0.4	0.196	0	1
SSSCA1	0	0.356706	0.376	0.172	0	1
RHEB	0	0.312027	0.846	0.642	0	1
PGK1	0	0.742413	0.96	0.756	0	1
ADAMTSL2	0	1.66932	0.282	0.078	0	1
SLC38A3	0	2.09489	0.255	0.052	0	1
MAGED1	0	0.255545	0.49	0.287	0	1
UBE2R2	0	0.337914	0.611	0.408	0	1
PYGL	0	0.795177	0.412	0.209	0	1
COMP	0	1.026	0.999	0.796	0	1
[truncated: 51,929 more rows]
